## SUBJECT INDEX TO VOLUME 67

Subject entries for all material in the JOURNAL appear in this index. The name of the author of an original article, in brackets, follows the subject entry. Entries from the JOURNAL departments are identified as follows: Book Reviews—(BR); Clinical Reports—(CR); Correspondence—(CO); Editorial Views—(EV); Laboratory Reports—(LR); Original Article—(OA); Review Article—(RA); Medical Intelligence—(MI); Special Article—(SA); Reports of Scientific Meetings—(SM).

### A

**Aberrant artery, See under Arteries**

**Acid-base equilibrium**

**acidosis**

effect of pH on calcium uptake in presence of anesthetics (LR) [Casella, Suite, Fisher & Blanck], 386

**alkalosis**

effect of pH on calcium uptake in presence of anesthetics (LR) [Casella, Suite, Fisher & Blanck], 386

**buffers**

during surgery in obstetric and gynecologic patients (CR) [Faure, Lim, Block, Tan & Roizen], 274

**distributions of pH and H<sup>+</sup>**

evaluation and comparison of (LR) [Colliver, Manchikanti & Markwell], 391

**fetal**

in maternal hypotension during epidural anesthesia for cesarean section (CR) [Brizgys, Dailey, Shnider, Kotelko & Levinson], 782

**gastric pH versus H<sup>+</sup>**

evaluation and comparison of (LR) [Colliver, Manchikanti & Markwell], 391

**lactate**

in response to tourniquet release in children (CR) [Brustowicz, Moncorge & Koka], 792

**pH versus H<sup>+</sup>**

evaluation and comparison of (LR) [Colliver, Manchikanti & Markwell], 391

**sodium bicarbonate**

during surgery in obstetric and gynecologic patients (CR) [Faure, Lim, Block, Tan & Roizen], 274

**Acidosis, See under Acid-base equilibrium**

**ACTH, See under Brain**

**Action potential, See under Heart**

**Adaptive feedback control, See under Pharmacokinetics**

**Addiction to anesthetics, See under Anesthetics**

**Adductor pollicis muscle, See under Muscle**

**Adenosine diphosphate, See under Metabolism**

**Adenosine triphosphate, See under Metabolism**

**Age factors**

do premature infants require anesthesia for surgery? (EV) [Berry & Gregory], 291

**elderly**

general or spinal anesthesia in: which is better? (CR) [Chung, Meier, Lautenschlager, Carmichael & Chung], 422

**geriatrics**

and cerebral vascular and metabolic effects of fentanyl and midazolam (OA) [Baughman, Hoffman, Albrecht & Miletich], 314

**infants**

**preterm**

minimum alveolar concentration of isoflurane in (OA) [Le Dez & Lerman], 301

pancuronium and vecuronium kinetics and dynamics and (OA) [Rupp, Castagnoli, Fisher & Miller], 45

**See also under Potency, anesthetic**

**AIDS, See under Complications**

**Air embolism, See under Embolism**

**Airway**

**epiglottitis**

in young infants (CR) [Blackstock, Adderley & Steward], 97

**foreign body**

esophageal, unexpected migration of (CR) [Greschner & Devitt], 565

**hypopharynx**

continuous pH during anesthesia via mask (CR) [Kofke, Fasano, Keamy & Derr], 434

**ligneous tracheobronchitis**

unusual cause of airway obstruction (CR) [Babcock, Bedford & Berry], 819

**obstruction**

direct laryngoscopy to relieve, in mediastinal mass (CR) [de Soto], 116

with distal tracheal stenosis, anesthetic management of (CR) [Borland, Reilly & Smith], 132

in ligneous tracheobronchitis (CR) [Babcock, Bedford & Berry], 819

and margin of safety in positioning modern double-lumen endotracheal tubes (OA) [Benumof, Partridge, Salvatierra & Keating], 729

**upper**

new laryngoscope blade to overcome (LR) [Bainton], 767

in young infants (CR) [Blackstock, Adderley & Steward], 97

**pH**

continuous pH during anesthesia via mask (CR) [Kofke, Fasano, Keamy & Derr], 434

**tracheal-esophageal fistula**

with distal tracheal stenosis, anesthetic management of (CR) [Borland, Reilly & Smith], 132

tracheo-bronchial angles in neonates (CO) [Tsuneto, Yamashita & Miyamoto], 151

**Akathisia, See under Complications**

**Alcohol**

**carmofur**

and disulfiram-like reaction after celiac plexus alcohol block (CR) [Noda, Umeda, Mori, Fukunaga & Mizoi], 809

**Alfentanil, See under Analgesics; Anesthetics, intravenous; Pharmacokinetics**

**Algorithm for O<sub>2</sub> saturation, See under Blood**

**Algorithms, See under Measurement techniques**

**Alkalosis, See under Acid-base equilibrium**

**Allergy**

**anaphylactic reaction**

severe, to dextran despite hapten inhibition (CR) [Bernstein, Rosenberg, Pada & Jaffe], 567

to protamine, laboratory test to detect (CO) [Levy], 281

Almitrine bismesylate, *See under Pharmacology*

Alpha adrenergic agonists, *See under Sympathetic nervous system; Receptors*

American Society of Anesthesiologists, *See under Organizations*

Amnesia, *See under Memory*

## Analgnesia

### epidural

- in high-risk surgical patients (CO) [Clark], 1026
- in high-risk surgical patients (CO) [Day], 1025
- in high-risk surgical patients (CO) [Frumin], 1023
- in high-risk surgical patients (CO) [Glass & Yeager], 1026
- in high-risk surgical patients (CO) [Jenkins], 1024
- in high-risk surgical patients (CO) [Kehlet], 1022

### obstetric

- during labor, epidural sufentanil/bupivacaine combinations for (CR) [Phillips], 835

### postoperative

- continuous thoracic epidural analgesia for, following thoracotomy (CR) [Logas, El-Baz, El-Ganzouri, Cullen, Staren, Faber & Ivankovich], 787
- epidural sufentanil (OA) [Benlabeled, Ecoffey, Levron, Flaisler & Gross], 948
- on medical-surgical wards, epidural morphine for (CR) [Busch & Stedman], 101
- percutaneous inguinal block for outpatient management of post-herniorrhaphy pain in children (CR) [Hinkle], 411

## Analgesics

### alfentanil

- muscle rigidity induced by, ketanserin pretreatment reverses (OA) [Weinger, Cline, Smith & Koob], 348

### fentanyl

- first pass uptake of, in human lung (OA) [Roerig, Kotrly, Vucins, Ahlf, Dawson & Kampine], 466
- interaction with thiopental (OA) [Kissin, Mason & Bradley], 331

### meperidine

- comparative pharmacokinetics of, in humans (EV) [Cousins], 875
- first pass uptake of, in human lung (OA) [Roerig, Kotrly, Vucins, Ahlf, Dawson & Kampine], 466
- pharmacokinetics of, in humans (OA) [Sjöström, Hartvig, Persson & Tamsen], 877
- pharmacokinetics of, in humans (OA) [Sjöström, Tamsen, Persson & Hartvig], 889

### morphine

- comparative pharmacokinetics of, in humans (EV) [Cousins], 875
- epidural, for postoperative pain on medical-surgical wards (CR) [Busch & Stedman], 101
- first pass uptake of, in human lung (OA) [Roerig, Kotrly, Vucins, Ahlf, Dawson & Kampine], 466
- interaction with thiopental (OA) [Kissin, Mason & Bradley], 331
- for low-back pain (CR) [Dallas, Lin, Wu & Wolskee], 408
- pharmacokinetics of, in humans (OA) [Sjöström, Hartvig, Persson & Tamsen], 877
- pharmacokinetics of, in humans (OA) [Sjöström, Tamsen, Persson & Hartvig], 889
- for postoperative pain relief following thoracotomy (CR) [Logas, El-Baz, El-Ganzouri, Cullen, Staren, Faber & Ivankovich], 787

## narcotics

- epidural, for postoperative pain on medical-surgical wards (CR) [Busch & Stedman], 101

### fentanyl

- assay methods for, in serum: gas-liquid chromatography *versus* radioimmunoassay (LR) [Woestenborghs, Stanski, Scott & Heykants], 85
- and bupivacaine, epidural, for obstetric analgesia (CR) [Cohen, Tan, Albright & Halpern], 403

- for extracorporeal shock wave lithotripsy, profound central nervous system depression from (CR) [Wells & Davies], 991
- large doses of, prolongation of QT interval in association with (CO) [Blair, Pruett, Crumrine & Balser], 442

- for low-back pain (CR) [Dallas, Lin, Wu & Wolskee], 408

### sufentanil

- bupivacaine combinations for analgesia during labor (CR) [Phillips], 835
- epidural, in children, analgesia and ventilatory response to CO<sub>2</sub> following (OA) [Benlabeled, Ecoffey, Levron, Flaisler & Gross], 948
- large doses of, prolongation of QT interval in association with (CO) [Blair, Pruett, Crumrine & Balser], 442

Anaphylaxis, *See under Allergy, Complications*

## Anatomy

### shoulder

- arthroscopy, pulse oximetry during (CO) [Gibbs, Handal & Nentwig], 150

### tracheobronchial tree

- and positioning modern double-lumen endotracheal tubes (OA) [Benumof, Partridge, Salvatierra & Keating], 729

## Anesthesia

### cardiac

- and cardiopulmonary bypass discontinuation, possibility of A-V shunting upon (CR) [Pauca & Meredith], 91

### cardiovascular

- pharmacologic EEG suppression during (OA) [Woodcock, Murkin, Farrar, Tweed, Guiraudon & McKenzie], 218

### closed circuit

- rapid calculation of isoflurane unit doses for (CO) [Lee], 283

### depth

- and EEG spectral edge frequency changes in laryngoscopy and intubation (CR) [Rampil & Matteo], 139

### gas exchange

- during thoracic surgical procedures (CR) [Howland, Carlon, Goldiner, Rooney, Concepcion, Bains & McCormack], 1009

### general

- intraocular pressure changes during muscular hyperactivity after (CO) [Grover, Mahajan & Sharma], 604
- intraocular pressure changes during muscular hyperactivity after (CO) [Williams], 604
- or spinal anesthesia: which is better in elderly (CR) [Chung, Meier, Lautenschlager, Carmichael & Chung], 422

### high-frequency jet ventilation

- during thoracic surgical procedures (CR) [Howland, Carlon, Goldiner, Rooney, Concepcion, Bains & McCormack], 1009
- and hypertension, effect of clonidine on perioperative hemodynamics and isoflurane requirements (OA) [Ghignone, Calvillo & Quintin], 3

### intravenous infusion

- Plasma Drug Efflux and (OA) [Crankshaw, Boyd & Bjorksten], 32

### neurosurgical

- for craniotomy for tumor, in bronchopleural fistula (CR) [Gutstein & Koblin], 804
- and effect of scalp infiltration on hemodynamic response to craniotomy under general anesthesia (CR) [Hillmar, Rung, Thompson & Davis], 1001
- succinylcholine-induced hyperkalemia during (CR) [Frankville & Drummond], 264
- vecuronium in, effect on intracranial pressure and hemodynamics (CR) [Stirt, Maggio, Haworth, Minton & Bedford], 570

### obstetric

- central venous pressure monitoring during (CO) [Robinson, Bungein & Albin], 147

# cesarean section

- central venous pressure monitoring during (CO) [Rupp], 146
- effects of maternal hypotension during epidural anesthesia for (CR) [Brizgys, Dailey, Shnider, Kotelko & Levinson], 782
- epidural fentanyl/bupivacaine mixtures for (CR) [Cohen, Tan, Albright & Halpern], 403
- halothane effect on asphyxiated fetal lamb (OA) [Check, Hughes, Dailey, Field, Pytko, Rosen, Parer & Shnider], 361

# in vitro fertilization

- success of, effect of nitrous oxide on (OA) [Rosen, Roizen, Eger, Glass, Martin, Dandekar, Dailey & Litt], 42
- magnesium interaction with succinylcholine-vecuronium sequence in eclampsia (CR) [Baraka & Yazigi], 806
- midazolam in (CO) [Seidman & Marx], 443
- modifying of fetal monitor during, may be hazardous (CO) [Sand], 448
- no evidence that anesthesiologists enhance care of parturient (CO) [Levinson, Shnider & Gibbs], 152
- no evidence that anesthesiologists enhance care of parturient (CO) [Singer], 152
- sodium bicarbonate buffers gastric acid during surgery in (CR), 274
- for vaginal delivery in patient with idiopathic hypertrophic subaortic stenosis (CR) [Minnich, Quirk & Clark], 590
- vecuronium and prolonged neuromuscular blockade in postpartum patients (CR) [Camp, Tessem, Adenwala & Joyce], 1006

# outpatient

- airway heating reduces recovery time (cost) in (CR) [Conahan, Williams, Apfelbaum & Lecky], 128
- effects of eliminating nitrous oxide in (CR) [Melnick & Johnson], 982
- epinephrine prolongs lidocaine spinal in (CR) [Moore, Chadwick & Ready], 416
- pediatric, glucose concentrations for routine intravenous infusion in (CR) [Welborn, Hannallah, McGill, Ruttimann & Hicks], 427
- propofol *versus* thiopental for (CR) [Johnston, Noseworthy, Anderson, Konopad & Grace], 431
- reaction of preoperative metoclopramide (CR) [Caldwell, Rains & McKitterick], 854

# pediatric

- Arnold-Chiari malformation type I appearing after tonsillectomy (CR) [Dong], 120
- in atlanto-axial subluxation and trisomy-21 (CR) [Williams, Somerville, Miner & Reilly], 253
- bronchial intubation: tube bevel and side of intubation (CO) [Baraka, Akel & Muallem], 869
- burn, erosion, and "sun" tan with use of pulse oximetry in (CR) [Miyasaka & Ohata], 1008
- cardiac function and, pulsed Doppler and two-dimensional echocardiography during (OA) [Murray, Vandewalker, Matherne & Mahoney], 211
- cardiovascular effect of isoflurane in lambs in (OA) [Brett, Teitel, Heymann & Rudolph], 60
- caudal, and blood flows in infants (OA) [Payen, Ecoffey, Carli & Dubouset], 681
- caudal and ilioinguinal/iliohypogastric nerve blocks in (CO) [Fell, Derrington & Wandless], 1020
- caudal and ilioinguinal/iliohypogastric nerve blocks in (CO) [Hannallah, Broadman, Belman, Abramowitz & Epstein], 1021
- continuous epidural infusion of bupivacaine for postoperative pain relief in (CR) [Desparmet, Meistelman, Barre & Saint-Maurice], 108
- for craniospinal radiotherapy (CR) [Glauber & Audenaert], 801

- effect of halothane on critical levels of oxygen transport in newborn lamb (OA) [Hershenson, O'Rourke, Schena & Crone], 174

- effect of halothane on steady-state levels of high-energy phosphates in (LR) [McAuliffe & Hickey], 231

- epidural, in Duchenne muscular dystrophy, effects of bupivacaine during (CR) [Murat, Esteve, Montay, Delleur, Gaudiche & Saint-Maurice], 249

- epidural sufentanil (OA) [Benlabed, Ecoffey, Levron, Flaisler & Gross], 948

# infant diseases

- and perianesthetic intracranial hemorrhage in preterm neonates (CR) [Friesen, Honda & Thieme], 814
- intravenous atropine reduces lower esophageal sphincter pressure in (CR) [Opie, Chaye & Steward], 989
- management of tracheal esophageal fistula with distal tracheal stenosis (CR) [Borland, Reilly & Smith], 132
- metabolic responses to tourniquet release in (CR) [Brustowicz, Moncorge & Koka], 792
- modified Pitot tube for measurement of tidal volume in (LR) [Wolf & Volgyesi], 775
- outpatient, glucose concentrations for routine intravenous infusion in (CR) [Welborn, Hannallah, McGill, Ruttimann & Hicks], 427
- percutaneous inguinal block for outpatient management of post-herniorrhaphy pain in children (CR) [Hinkle], 411
- and perianesthetic intracranial hemorrhage in preterm neonates (CR) [Friesen, Honda & Thieme], 814
- perioperative management of conjoined twins (MI) [Diaz & Furman], 965
- pharmacokinetics of alfentanil (OA) [Goresky, Koren, Sabourin, Sale & Strunin], 654
- premature infants
  - and perianesthetic intracranial hemorrhage in preterm neonates (CR) [Friesen, Honda & Thieme], 814
- problems associated with endotracheal tubes with monitoring lumens in (CO) [Miller], 1018
- problems associated with endotracheal tubes with monitoring lumens in (CO) [Wiegert], 1019
- sacral intervertebral epidural block in (CR) [Busoni & Sarti], 993
- in severe hyperinsulinism treated by pancreatectomy (CR) [Yamashita & Tsuneto], 985
- thiopental requirements for induction of anesthesia in (CR) [Jonmarker, Westrin, Larsson & Werner], 104
- and tracheo-bronchial angles in neonates (CO) [Tsuneto, Yamashita & Miyamoto], 151

# requirements

## MAC

- of isoflurane in preterm neonates (OA) [Le Dez & Lerman], 301

# thoracic

- and arterial oxygenation during one-lung ventilation (OA) [Benumof, Augustine & Gibbons], 910
- for craniotomy for tumor, in bronchopleural fistula (CR) [Gutstein & Koblin], 804
- intraoperative re-expansion pulmonary edema during (CR) [Desiderio, Meister & Bedford], 821
- and sequential one-lung ventilation for bilateral bullectomy (CR) [Benumof], 268
- during thoracic surgical procedures (CR) [Howland, Carlon, Goldiner, Rooney, Concepcion, Bains & McCormack], 1009
- and ventilation/perfusion lung scans to predict oxygenation during one-lung anesthesia (CR) [Hurford, Kolker & Strauss], 841

Anesthesia complications, *See under* Complications

Anesthesia machine, *See under* Equipment

**Anesthesiologists**

- no evidence that they enhance care of parturient (CO) [Levinson, Shnider & Gibbs], 152
- no evidence that they enhance care of parturient (CO) [Singer], 152

**Anesthetic equipment, See under Equipment****Anesthetic ointment, See under Equipment****Anesthetic potency, See under Potency****Anesthetic requirements, See under Anesthesia****Anesthetic techniques****balanced**

- or spinal anesthesia: which is better in elderly (CR) [Chung, Meier, Lautenschlager, Carmichael & Chung], 422

**Bier block**

- apnea and syncope following, in same patient (CO) [Woo & McQueen], 281

**caudal**

- in children undergoing orchidopexy (CO) [Fell, Derrington & Wandless], 1020
- in children undergoing orchidopexy (CO) [Hannallah, Broadman, Belman, Abramowitz & Epstein], 1021
- pulsed Doppler ascending aortic, carotid, brachial and femoral artery blood flows during (OA) [Payen, Ecoffey, Carli & Dubousset], 681

**celiac plexus**

- another aspect of (CO) [Lu, Frost & Goldiner], 1017
- disulfiram-like reaction associated with carmofur (CR) [Noda, Umeda, Mori, Fukunaga & Mizoi], 809

**continuous infusion**

- of midazolam for sedation following cardiac surgery (CR) [Westphal, Cheng, White, Sladen, Rosenthal & Sung], 257

**endobronchial intubation**

- in children: tube bevel and side of intubation (CO) [Baraka, Akel & Muallem], 869
- selective blind, in children and adults (CR) [Kubota, Kubota, Toyoda, Ishida, Asada & Matsuura], 587

**epidural**

- accidental injection of methohexital in (CR) [Wells, Davies & Wagner], 846
- in children with muscular dystrophy, effects of bupivacaine during (CR) [Murat, Esteve, Montay, Delleur, Gaudiche & Saint-Maurice], 249
- comparative pharmacokinetics of opioids using, in humans (EV) [Cousins], 875
- in high-risk surgical patients (CO) [Clark], 1026
- in high-risk surgical patients (CO) [Day], 1025
- in high-risk surgical patients (CO) [Frumin], 1023
- in high-risk surgical patients (CO) [Glass & Yeager], 1026
- in high-risk surgical patients (CO) [Jenkins], 1024
- in high-risk surgical patients (CO) [Kehlet], 1022
- morphine and methylprednisolone in, for low-back pain (CR) [Dallas, Lin, Wu & Wolskee], 408
- morphine in, for postoperative pain on medical-surgical wards (CR) [Busch & Stedman], 101
- narcotics in, for extracorporeal shock wave lithotripsy, profound central nervous system depression from (CR) [Wells & Davies], 991
- pharmacokinetics of morphine and meperidine in, in humans (OA) [Sjöström, Hartvig, Persson & Tamsen], 877
- for postoperative pain relief following thoractomy (CR) [Logas, El-Baz, El-Ganzouri, Cullen, Staren, Faber & Ivankovich], 787
- for postoperative pain relief in children (CR) [Desparmet, Meistelman, Barre & Saint-Maurice], 108
- pulsed Doppler ascending aortic, carotid, brachial and femoral

artery blood flows during (OA) [Payen, Ecoffey, Carli & Dubousset], 681

**sacral intervertebral**

block with (CR) [Busoni & Sarti], 993

sufentanil, in children, analgesia and ventilatory response to CO<sub>2</sub> following (OA) [Benlabeled, Ecoffey, Levron, Flaisler & Gross], 948

sufentil/bupivacaine combinations in, for analgesia during labor (CR) [Phillips], 835

for vaginal delivery, every dose in, can be a test dose (CR) [Van Zundert, Vaes, Soetens, De Vel, Van Der Aa, Van Der Donck, Meeuwis & DeWolf], 436

for vaginal delivery in patient with idiopathic hypertrophic sub-aortic stenosis (CR) [Minnich, Quirk & Clark], 590

**epidural morphine**

chronic, and preservative-induced injury (CR) [DuPen, Ramsey & Chin], 987

**epidural narcotic**

fentanyl/bupivacaine mixtures in, for obstetric analgesia (CR) [Cohen, Tan, Albright & Halpern], 403

**fiberoptic bronchoscopy**

another use of (CO) [Stone], 608

and positioning modern double-lumen endotracheal tubes (OA) [Benumof, Partridge, Salvatierra & Keating], 729

**hypotension, induced**

nifedipine, cardiovascular effects of (OA) [Schulte-Sasse & Tarnow], 492

**nitroprusside**

reaction with secondary amines, carcinogenicity of N-nitrosoamines derived from (CO) [Klopman, Frierson & Dauchot], 279

**ilioinguinal/iliohypogastric**

in children undergoing orchidopexy (CO) [Fell, Derrington & Wandless], 1020

in children undergoing orchidopexy (CO) [Hannallah, Broadman, Belman, Abramowitz & Epstein], 1021

**induction**

in comparison of inductions of halothane oxygen anesthesia (CR) [Ruffe & Snider], 584

**infiltration**

bupivacaine scalp infiltration in, effect of, on hemodynamic response to craniotomy (CR) [Hillmar, Rung, Thompson & Davis], 1001

ring block of penis for post-circumcision analgesia (CR) [Broadman, Hannallah, Belman, Elder, Ruttimann & Epstein], 399

**infusion**

vecuronium in: effect of anesthetic agents on (OA) [Cannon, Fahey, Castagnoli, Furuta, Canfell, Sharma & Miller], 503

**inguinal**

percutaneous inguinal block for outpatient management of post-herniorrhaphy pain in children (CR) [Hinkle], 411

**inhalation**

in comparison of inductions of halothane oxygen anesthesia (CR) [Ruffe & Snider], 584

vecuronium in: effect of anesthetic agents on (OA) [Cannon, Fahey, Castagnoli, Furuta, Canfell, Sharma & Miller], 503

**intrapleural**

with bupivacaine—dynamic and kinetic evaluation (CR) [Seltzer, Larijani, Goldberg & Marr], 798

infusion of bupivacaine for analgesia after thoracotomy (CR) [Rosenberg, Scheinin, Lepäntalo & Lindfors], 811

- intrathecal**  
comparative pharmacokinetics of opioids using, in humans (EV) [Cousins], 875  
pharmacokinetics of morphine and meperidine in, in humans (OA) [Sjöström, Tamsen, Persson & Hartvig], 889
- one-lung ventilation**  
halothane and isoflurane only slightly impair arterial oxygenation during, in thoracotomy (OA) [Benumof, Augustine & Gibbons], 910
- regional**  
accidental injection of methohexital in (CR) [Wells, Davies & Wagner], 846  
bupivacaine scalp infiltration in, effect of, on hemodynamic response to craniotomy (CR) [Hillmar, Rung, Thompson & Davis], 1001  
with bupivacaine—dynamic and kinetic evaluation (CR) [Seltzer, Larijani, Goldberg & Marr], 798  
in child with epidermolysis bullosa (CR) [Kaplan & Strauch], 262  
disulfiram-like reaction associated with carmofer (CR) [Noda, Umeda, Mori, Fukunaga & Mizoi], 809  
infusion of bupivacaine for analgesia after thoracotomy (CR) [Rosenberg, Scheinin, Lepäntalo & Lindfors], 811
- lumbar epidural**  
for cesarean section, maternal hypotension during, neonatal effects of (CR) [Brizgys, Dailey, Shnider, Kotelko & Levinson], 782  
narcotics in, for extracorporeal shock wave lithotripsy, profound central nervous system depression from (CR) [Wells & Davies], 991  
percutaneous inguinal block for outpatient management of post-herniorrhaphy pain in children (CR) [Hinkle], 411  
for relief of post-circumcision pain (CR) [Tree-trakarn, Pirayavaraporn & Lertakyamanee], 395  
sacral intervertebral epidural block (CR) [Busoni & Sarti], 993
- sympathetic blockade**  
in prevention of postherpetic neuralgia (CO) [Bauman], 441  
in prevention of postherpetic neuralgia (CO) [Yanagida & Suwa], 441
- spinal**  
assessment of level of anesthesia in, using neuromuscular stimulator (CR) [Meyer & McCune], 125  
or general: which is better in elderly? (CR) [Chung, Meier, Lautenschlager, Carmichael & Chung], 422  
with lidocaine, epinephrine prolongs (CR) [Moore, Chadwick & Ready], 416  
sterile draping technique for (CO) [Ellermeyer], 150  
and use-dependent block in mammalian axons (OA) [Fink & Cairns], 477
- stellate ganglion block**  
normal saline as placebo (CR) [Haddox & Kettler], 832
- subarachnoid block**  
tetracaine in, dose-response relationship of clonidine in (OA) [Mensink, Kozody, Kehler & Wade], 717
- topical**  
for relief of post-circumcision pain (CR) [Tree-trakarn, Pirayavaraporn & Lertakyamanee], 395
- tracheal intubation**  
and positioning modern double-lumen endotracheal tubes (OA) [Benumof, Partridge, Salvatierra & Keating], 729
- Anesthetics**  
**degradation**  
and stability of sevoflurane (LR) [Strum, Johnson & Eger], 779
- gases**  
**nitrous oxide**  
50%, in oxygen, depression of swallowing reflex during analgesia produced by (CR) [Nishino, Takizawa, Yokokawa & Hiraga], 995  
cerebral blood volume is increased in dogs during, in dogs (OA) [Archer, Labrecque, Tyler, Meyer & Trop], 642  
effect of, on *in vitro* fertilization success (OA) [Rosen, Roizen, Eger, Glass, Martin, Dandekar, Dailey & Litt], 42  
effects of eliminating, in outpatient anesthesia (CR) [Melnick & Johnson], 982  
effects of, on coronary perfusion after coronary air embolism (OA) [Tuman, McCarthy, Spiess, Overfield & Ivankovich], 952  
fentanyl, core temperature changes during (CR) [Sessler, Rubinstein & Eger], 137  
and fentanyl do not induce myocardial ischemia in ischemic heart disease (OA) [Cahalan, Prakash, Rulf, Cahalan, Mayala, Lurz, Rosseel, Lachitjaran, Siphanto, Gussenhoven & Roelandt], 925  
flammability of endotracheal tubes in oxygen and (LR) [Wolf & Simpson], 236  
prolonged hypocapnia does not alter rate of cerebrospinal fluid production during (OA) [Artru & Hornbein], 66  
teratogenic and reproductive effects of, in Sprague-Dawley rats (OA) [Fujinaga, Baden, Yhap & Mazze], 960
- general**  
depression of myocardial contractility by (RA) [Rusy & Komai], 745
- inhalation**  
**isoflurane**  
and verapamil, causes regional left-ventricular dyssynchrony in dog (OA) [Videcoq, Arvieux, Ramsay, Foëx, Stone, Ryder & Jones], 635
- intravenous**  
**addiction**  
to ketamine (CO) [Kamaya & Krishna], 861
- alfentanil**  
muscle rigidity induced by, ketanserin pretreatment reverses (OA) [Weinger, Cline, Smith & Koob], 348  
pharmacokinetics of, in children (OA) [Goresky, Koren, Sabourin, Sale & Strunin], 654
- barbiturates**  
constant blood concentration of, Plasma Drug Efflux and (OA) [Crankshaw, Boyd & Bjorksten], 32
- diazepam**  
exacerbated spinal neurologic deficit with, in cervical spondylosis (CR) [Miller, Crosby & Sundaram], 844
- droperidol**  
effects on sympathetic activity and baroreflex control of heart rate in humans (OA) [Balagny, Gauzit, Marty, Couderc, Levron & Desmonts], 473  
exacerbated spinal neurologic deficit with, in cervical spondylosis (CR) [Miller, Crosby & Sundaram], 844
- etomidate**  
induction of anesthesia with, effect of second dose of succinylcholine on heart rate and rhythm following (CR) [Abdul-Rasool, Sears & Katz], 795  
and natural killer cell activity during coronary artery bypass grafting (OA) [Tønnesen, Brinkløv, Christensen, Olesen & Madsen], 526
- fentanyl**  
antagonism of neuromuscular blockade during, edrophonium/atropine mixture for (CR) [Urquhart, Ramsey, Royster, Morell & Gerr], 561  
assay methods for, in serum: gas-liquid chromatography *versus* radioimmunoassay (LR) [Woestenborghs, Stanski, Scott & Heykants], 85

- cerebral vascular and metabolic effects of, in young and aged rats (OA) [Baughman, Hoffman, Albrecht & Miletich], 314
- continuous infusion of vecuronium and (OA) [Cannon, Fahey, Castagnoli, Furuta, Canfell, Sharma & Miller], 503
- effects of, on arterial and venous concentrations of propranolol in dog (OA) [Gordon, Wood, Koshakji, Wilkinson, Dupont & Wood], 225
- effects of, on visual evoked potentials in humans (CR) [Chi, McCoy & Field], 827
- first pass uptake of, in human lung (OA) [Roerig, Kotrly, Vucins, Ahlf, Dawson & Kampine], 466
- and natural killer cell activity during coronary artery bypass grafting (OA) [Tønnesen, Brinkløv, Christensen, Olesen & Madsen], 526
- N<sub>2</sub>O, core temperature changes during (CR) [Sessler, Rubinstein & Eger], 137
- and nitrous oxide do not induce myocardial ischemia in ischemic heart disease (OA) [Cahalan, Prakash, Rulf, Cahalan, Mayala, Lurz, Rosseel, Lachitjjaran, Siphanto, Gussenhoven & Roelandt], 925
- in study of calcium entry blockers and  $\alpha$ -receptor responsiveness (OA) [Massagee, McIntyre, Kates, Reves & Bai], 485
- infusions**
- and enflurane sparing effect of sufentanil in dogs (OA) [Hall, Murphy & Hug], 518
- ketamine**
- addiction (CO) [Kamaya & Krishna], 861
- meperidine**
- first pass uptake of, in human lung (OA) [Roerig, Kotrly, Vucins, Ahlf, Dawson & Kampine], 466
- methohexital**
- closed-loop feedback control of, by quantitative EEG analysis in humans (OA) [Schwilden, Schüttler & Stoeckel], 341
- constant blood concentration of, Plasma Drug Efflux and (OA) [Crankshaw, Boyd & Bjorksten], 32
- epidural, accidental injection of (CR) [Wells, Davies & Wagner], 846
- midazolam**
- following cardiac surgery (CR) [Westphal, Cheng, White, Sladen, Rosenthal & Sung], 257
- cerebral vascular and metabolic effects of, in young and aged rats (OA) [Baughman, Hoffman, Albrecht & Miletich], 314
- induction of anesthesia with, effect of second dose of succinylcholine on heart rate and rhythm following (CR) [Abdul-Rasool, Sears & Katz], 795
- and natural killer cell activity during coronary artery bypass grafting (OA) [Tønnesen, Brinkløv, Christensen, Olesen & Madsen], 526
- in obstetric anesthesia (CO) [Seidman & Marx], 443
- pentobarbital and thiopental anesthetic interactions with (OA) [Kissin, Mason & Bradley], 26
- morphine**
- first pass uptake of, in human lung (OA) [Roerig, Kotrly, Vucins, Ahlf, Dawson & Kampine], 466
- narcotic**
- and enflurane sparing effect of sufentanil in dogs (OA) [Hall, Murphy & Hug], 518
- pentobarbital**
- anesthetics interactions with midazolam (OA) [Kissin, Mason & Bradley], 26
- effects of, on transpulmonary passage of venous air emboli in dogs (OA) [Yahagi & Furuya], 905
- propofol**
- versus thiopental for outpatient anesthesia (CR) [Johnston, Noseworthy, Anderson, Konopad & Grace], 431
- sufentanil**
- and clonidine, and hemodynamics in coronary bypass surgery (OA) [Flacke, Bloor, Flacke, Wong, Dazza, Stead & Laks], 11
- enflurane sparing effect of, in dogs (OA) [Hall, Murphy & Hug], 518
- without EEG seizure activity, myoclonus following (CR) [Bowlde], 593
- thiopental**
- anesthetics interactions with midazolam (OA) [Kissin, Mason & Bradley], 26
- constant blood concentration of, Plasma Drug Efflux and (OA) [Crankshaw, Boyd & Bjorksten], 32
- induction of anesthesia with, effect of second dose of succinylcholine on heart rate and rhythm following (CR) [Abdul-Rasool, Sears & Katz], 795
- morphine and fentanyl hypnotic interactions with (OA) [Kissin, Mason & Bradley], 331
- pharmacologic EEG suppression during (OA) [Woodcock, Murkin, Farrar, Tweed, Guiraudon & McKenzie], 218
- reduction of tonic ribcage muscle activity with (OA) [Drummond], 695
- requirements for induction of anesthesia in children (CR) [Jonmarker, Westrin, Larsson & Werner], 104
- versus propofol for outpatient anesthesia (CR) [Johnston, Noseworthy, Anderson, Konopad & Grace], 431
- tolerance**
- to ketamine (CO) [Kamaya & Krishna], 861
- local**
- bupivacaine**
- continuous epidural infusion of, for postoperative pain relief in children (CR) [Desparmet, Meistelman, Barre & Saint-Maurice], 108
- and fentanyl, epidural, for obstetric analgesia (CR) [Cohen, Tan, Albright & Halpern], 403
- intrapleural (CR) [Seltzer, Larijani, Goldberg & Marr], 798
- intrapleural, for analgesia after thoracotomy (CR) [Rosenberg, Scheinin, Lepäntalo & Lindfors], 811
- for postoperative pain relief following thoractomy (CR) [Logas, El-Baz, El-Ganzouri, Cullen, Staren, Faber & Ivankovich], 787
- scalp infiltration, effect of, on hemodynamic response to craniotomy under general anesthesia (CR) [Hillmar, Rung, Thompson & Davis], 1001
- sufentanil combinations for analgesia during labor (CR) [Phillips], 835
- clearance**
- influence of right-to-left cardiac shunt on (OA) [Bokesch, Castaneda, Ziemer & Wilson], 739
- lidocaine**
- influence of right-to-left cardiac shunt on (OA) [Bokesch, Castaneda, Ziemer & Wilson], 739
- in use-dependent block in mammalian axons (OA) [Fink & Cairns], 477
- mepivacaine**
- in prevention of postherpetic neuralgia (CO) [Bauman], 441
- in prevention of postherpetic neuralgia (CO) [Yanagida & Suwa], 441
- procaine**
- in ultralong-lasting nerve block, with thiethyldecyl ammonium, neurotoxicity in (OA) [Lipfert, Seitz & Arndt], 896
- tetracaine**
- spinal anesthesia, dose-response relationship of clonidine in (OA) [Mensink, Kozody, Kehler & Wade], 717

**tetraethylammonium derivatives**

with local anesthetic, in ultralong-lasting nerve block, neurotoxicity in (OA) [Lipfert, Seitz & Arndt], 896

**volatile**

**costs**

of low-flow anesthesia (CO) [Matjasko], 863

**elimination**

new techniques, new opportunities, old problems (EV) [Smith & Chance], 157

**enflurane**

continuous infusion of vecuronium and (OA) [Cannon, Fahey, Castagnoli, Furuta, Canfell, Sharma & Miller], 503

effect of pH on calcium uptake in presence of (LR) [Casella, Suite, Fisher & Blanck], 386

impaired myocardial conduction in patients receiving diltiazem therapy during (CR) [Hantler, Wilton, Learned, Hill & Knight], 94

increase oxygen consumption in isolated hepatocytes from phenobarbital-treated rats (OA) [Becker, Miletich & Albrecht], 185

isoflurane compared to, decreases frequency of cerebral ischemia during carotid endarterectomy (OA) [Michenfelder, Sundt, Fode & Sharbrough], 336

opisthotonus during, in mice (LR) [Komatsu & Ogli], 771

sparing effect of sufentanil in dogs (OA) [Hall, Murphy & Hug], 518

and verapamil, pharmacokinetics and autonomic nervous system in interaction between (OA) [Chelly, Hysing, Hill, Abernethy, Diewati, Doursout & Merin], 320

**halothane**

actions of, and ischemia related arrhythmias (OA) [Turner, Bosnjak & Kampine], 619

cause or cure for arrhythmias? (EV) [Atlee], 617

and critical levels of oxygen transport in anesthetized newborn lamb (OA) [Hershenson, O'Rourke, Schena & Crone], 174

following cryogenic brain injury in rabbits, intracranial pressure effects of (OA) [Scheller, Todd, Drummond & Zornow], 507

effect of, on asphyxiated fetal lamb (OA) [Cheek, Hughes, Dailey, Field, Pytko, Rosen, Parer & Shnider], 361

effect of, on cardiac function in infants and small children, pulsed Doppler and two-dimensional echocardiography and (OA) [Murray, Vandewalker, Matherne & Mahoney], 211

effect of pH on calcium uptake in presence of (LR) [Casella, Suite, Fisher & Blanck], 386

effects of, on arterial and venous concentrations of propranolol in dog (OA) [Gordon, Wood, Koshakji, Wilkinson, Dupont & Wood], 225

effects of, on coronary vascular resistance and collateral myocardial blood flow: capacity to induce coronary steal (OA) [Cason, Verrier, London, Mangano & Hickey], 665

effects of, on transpulmonary passage of venous air emboli in dogs (OA) [Yahagi & Furuya], 905

effects of, on upper respiratory tract infections in children (OA) [Tait & Knight], 930

and effects of succinylcholine on mouth opening (OA) [Van Der Spek, Fang, Ashton-Miller, Stohler, Carlson & Schork], 459

effects on human beta-adrenergic receptor of lymphocyte membranes (LR) [Marty, Nivoche, Nimier, Rocchiccioli, Luscombe, Henzel, Loiseau & Desmonts], 974

hepatic oxygen supply during, in guinea pigs (OA) [Hursh, Gelman & Bradley], 701

increase oxygen consumption in isolated hepatocytes from phenobarbital-treated rats (OA) [Becker, Miletich & Albrecht], 185

inhibits calcium accumulation following myocardial ischemia and calcium paradox in guinea pig hearts (OA) [Hoka, Bosnjak & Kampine], 197

isoflurane compared to, decreases frequency of cerebral ischemia during carotid endarterectomy (OA) [Michenfelder, Sundt, Fode & Sharbrough], 336

MAC in rats, clonidine reduces (CO) [Maze, Birch & Vickery], 868

mechanism of negative inotropic action of (OA) [Murray, Blanck, Rogers & Jacobus], 649

metabolism in cirrhotic rats (OA) [Baden, Serra, Fujinaga & Mazze], 660

/O<sub>2</sub> anesthesia, core temperature changes during (CR) [Sessler, Rubinstein & Eger], 137

only slightly impairs arterial oxygenation during one-lung ventilation for thoracotomy (OA) [Benumof, Augustine & Gibbons], 910

opisthotonus during, in mice (LR) [Komatsu & Ogli], 771

potentiates citrate toxicity in dogs (OA) [Coté], 676

prolonged hypocapnia does not alter rate of cerebrospinal fluid production during (OA) [Artru & Hornbein], 66

rapid and conventional inhalation inductions of, compared (CR) [Ruffe & Snider], 584

repeated, hepatic effects of, in hypoxic rat model (OA) [Plummer, Hall, Jenner & Cousins], 355

and serotonin metabolism at low pulmonary flow (OA) [Watkins & Rannels], 916

stability of, in soda lime (LR) [Strum, Johnson & Eger], 779

and steady-state levels of high-energy phosphates in neonatal heart (LR) [McAuliffe & Hickey], 231

in study of cardiovascular effects of nifedipine or verapamil (OA) [Schulte-Sasse & Tarnow], 492

uptake and elimination, *in vivo* study of, in rat brain with fluorine nuclear magnetic resonance spectroscopy (OA) [Litt, González-Méndez, James, Sessler, Mills, Chew, Moseley, Pereira, Severinghaus & Hamilton], 161

and verapamil, pharmacokinetics and autonomic nervous system in interaction between (OA) [Chelly, Hysing, Hill, Abernethy, Diewati, Doursout & Merin], 320

without succinylcholine, acute rhabdomyolysis following (CR) [Rubiano, Chang, Carroll, Sonbolian & Larson], 856

**isoflurane**

antagonism of neuromuscular blockade during, edrophonium/atropine mixture for (CR) [Urquhart, Ramsey, Royster, Morell & Gerr], 561

cardiovascular effects of, in lambs (OA) [Brett, Teitel, Heymann & Rudolph], 60

cerebral blood volume is increased in dogs during, in dogs (OA) [Archer, Labrecque, Tyler, Meyer & Trop], 642

and clonidine, and hemodynamics in coronary bypass surgery (OA) [Flacke, Bloor, Flacke, Wong, Dazza, Stead & Laks], 11

compared to enflurane and halothane, in decreasing frequency of cerebral ischemia during carotid endarterectomy (OA) [Michenfelder, Sundt, Fode & Sharbrough], 336

continuous infusion of vecuronium and (OA) [Cannon, Fahey, Castagnoli, Furuta, Canfell, Sharma & Miller], 503

following cryogenic brain injury in rabbits, intracranial pressure effects of (OA) [Scheller, Todd, Drummond & Zornow], 507

dogs anesthetized with, detrimental effect of lidocaine on cerebral metabolism in (OA) [Milde & Milde], 180

effect of, on cardiac function in infants and small children, pulsed Doppler and two-dimensional echocardiography and (OA) [Murray, Vandewalker, Matherne & Mahoney], 211

- effect of, on *in vitro* fertilization success (OA) [Rosen, Roizen, Eger, Glass, Martin, Dandekar, Dailey & Litt], 42
- effect of pH on calcium uptake in presence of (LR) [Casella, Suite, Fisher & Blanck], 386
- effects of, on coronary vascular resistance and collateral myocardial blood flow: capacity to induce coronary steal (OA) [Cason, Verrier, London, Mangano & Hickey], 665
- hemodynamic effects of UL-FS 49 and propranolol in dogs anesthetized with (OA) [Riley, Gross, Kampine & Warltier], 707
- hepatic necrosis and death following (CR) [Carrigan & Straughen], 581
- hepatic oxygen supply during, in guinea pigs (OA) [Hursh, Gelman & Bradley], 701
- increase oxygen consumption in isolated hepatocytes from phenobarbital-treated rats (OA) [Becker, Miletich & Albrecht], 185
- is it dangerous for patient with coronary artery disease? (CO) [Abramowitz], 286
- is it dangerous for patient with coronary artery disease? (CO) [Becker], 287
- is it dangerous for patient with coronary artery disease? (CO) [Hamilton], 286
- is it dangerous for patient with coronary artery disease? (CO) [Merlin], 284
- minimum alveolar concentration of, in preterm neonates (OA) [Le Dez & Lerman], 301
- only slightly impairs arterial oxygenation during one-lung ventilation for thoracotomy (OA) [Benumof, Augustine & Gibbons], 910
- opisthotonus during, in mice (LR) [Komatsu & Ogli], 771
- pharmacologic EEG suppression during (OA) [Woodcock, Murkin, Farrar, Tweed, Guiraudon & McKenzie], 218
- requirements, effect of clonidine on perioperative hemodynamics and (OA) [Chignone, Calvillo & Quintin], 3
- stability of, in soda lime (LR) [Strum, Johnson & Eger], 779
- in suppression of neostigmine-induced fasciculations (OA) [Baker & Stanec], 942
- teratogenic and reproductive effects of, in Sprague-Dawley rats (OA) [Fujinaga, Baden, Yhap & Mazze], 960
- unit doses, rapid calculation of, for closed-circuit anesthesia (CO) [Lee], 283
- and verapamil, pharmacokinetics and autonomic nervous system in interaction between (OA) [Chelly, Hysing, Hill, Abernethy, Diewati, Doursout & Merlin], 320
- lidocaine**
- detrimental effect of, on cerebral metabolism in dogs anesthetized with isoflurane (OA) [Milde & Milde], 180
- low flow**
- economic impact of (CO) [Matjasko], 863
- sevoflurane**
- stability of, in soda lime (LR) [Strum, Johnson & Eger], 779
- trace concentrations**
- associated with keyed filling devices (CO) [Williams, Dicks & Benson], 610
- and intraocular pressure changes during muscular hyperactivity after general anesthesia (CO) [Grover, Mahajan & Sharma], 604
- uptake**
- new techniques, new opportunities, old problems (EV) [Smith & Chance], 157
- Anorexia nervosa, See under Complications**
- Antacids, See under Gastrointestinal tract**
- Antagonists**
- beta adrenergic receptors**
- propranolol**
- and UL-FS 49, hemodynamic effects of, in isoflurane-anesthetized dogs (OA) [Riley, Gross, Kampine & Warltier], 707
- neuromuscular**
- neostigmine**
- fasciculations produced by, suppression of (OA) [Baker & Stanec], 942
- neuromuscular relaxants**
- edrophonium**
- atropine mixture, for antagonism of neuromuscular blockade, heart rate and rhythm following (CR) [Urquhart, Ramsey, Royster, Morell & Gerr], 561
- serotonergic**
- ketanserin**
- pretreatment reverses alfentanil-induced muscle rigidity (OA) [Weinger, Cline, Smith & Koob], 348
- Antidiuretic hormones, See under Hormones**
- Antihistamine, See under Premedication**
- Anxiety, See under Psychologic responses**
- Apnea, See under Complications**
- Arnold-Chiari malformation, See under Complications**
- Arrhythmias, See under Heart**
- Arterial and venous blood sampling, See under Pharmacokinetics**
- Arteries**
- aberrant**
- radial, inadvertent cannulation of (CO) [Westover], 610
- coronary**
- canine, isoflurane causes inhibition of contractile responses of (OA) [Blaise, Sill, Nugent, Van Dyke & Vanhoutte], 513
- disease of, is isoflurane dangerous for patient with? (CO) [Abramowitz], 286
- disease of, is isoflurane dangerous for patient with? (CO) [Becker], 287
- disease of, is isoflurane dangerous for patient with? (CO) [Hamilton], 286
- disease of, is isoflurane dangerous for patient with? (CO) [Merlin], 284
- steal**
- isoflurane, halothane, and (OA) [Cason, Verrier, London, Mangano & Hickey], 665
- endothelium**
- dependent inhibition of coronary arteries, isoflurane causes (OA) [Blaise, Sill, Nugent, Van Dyke & Vanhoutte], 513
- radial**
- aberrant, inadvertent cannulation of (CO) [Westover], 610
- Artificial ventilation, See under Ventilation**
- Asphyxia, fetal, See under Complications**
- Aspiration, See under Complications**
- Asystole, See under Complications**
- Ataractics**
- phenothiazines**
- fluphenazine**
- in neuroleptic malignant syndrome (OA) [Caroff, Rosenberg, Fletcher, Heiman-Patterson & Mann], 20
- Atelectasis, See under Lung(s)**
- Atlanto-axial subluxation, See under Complications**
- Atracurium, See under Biotransformation (drug); Neuromuscular relaxants; Pharmacokinetics; Interactions (drug); Pharmacodynamics; Pharmacology**
- Atropine, See under Parasympathetic nervous system; Premedication**
- Automatic blood pressure monitoring device, See under Equipment**



Autotransfusion, *See under* Transfusion  
Awake tracheal intubation, *See under* Intubation  
Axon, *See under* Nerve(s)

**B**

Bain circuit, *See under* Equipment  
Balanced anesthesia, *See under* Anesthetic techniques  
Barbiturates, *See under* Anesthetics, intravenous; Interactions (drugs); Pharmacology  
Baroreceptor reflexes, *See under* Blood pressure  
Behavioral abnormalities, *See under* Complications  
Benzodiazepines, *See under* Hypnotics; Interactions (drugs); Pharmacology  
Beta adrenergic blocking drugs, *See under* Sympathetic nervous system  
Beta adrenergic receptors, *See under* Receptors  
Beta-endorphin, *See under* Brain  
Beta-receptors, *See under* Sympathetic nervous system  
Bier block, *See under* Anesthetic techniques  
Biochemistry, cerebral, *See under* Brain  
Biotransformation (drug)  
    atracurium  
        *in vitro*  
            and in humans (OA) [Tsui, Graham & Torda], 722  
        *in vivo*  
            and in vitro (OA) [Tsui, Graham & Torda], 722  
Blood  
    algorithm for O<sub>2</sub> saturation  
        and pulse oximetry errors (LR) [Severinghaus & Naifeh], 551  
    coagulation  
        lethal, during coronary artery bypass graft surgery (CR) [Litwack & Horrow], 134  
    protamine  
        laboratory test to detect antibodies to (CO) [Levy], 281  
        and protamine in prevention of pulmonary hypertension (CR) [Kronenfeld, Garguilo, Weinberg, Grant, Thomas & Turndorf], 578  
    glucose  
        concentrations for routine intravenous infusion in pediatric outpatient surgery (CR) [Welborn, Hannallah, McGill, Ruttimann & Hicks], 427  
        reevaluation of intraoperative use (MI) [Sieber, Smith, Traystman & Wollman], 72  
    hemorrhage  
        graded, systolic pressure variation as indicator of hypovolemia (OA) [Perel, Pizov & Cotev], 498  
    oxygen dissociation curve  
        and pulse oximetry errors (LR) [Severinghaus & Naifeh], 551  
    oxygen saturation  
        and pulse oximetry errors (LR) [Severinghaus & Naifeh], 551  
    plasma oncotic pressure  
        and osmolality, changes in, acute cerebral effects of (OA) [Zornow, Todd & Moore], 936  
    plasmapheresis  
        and cerebral effects of osmolality and oncotic pressure (OA) [Zornow, Todd & Moore], 936  
    protamine  
        left atrial injection of, does not reliably prevent pulmonary hypertension (CR) [Kronenfeld, Garguilo, Weinberg, Grant, Thomas & Turndorf], 578  
    transient hypoxia  
        and pulse oximetry errors (LR) [Severinghaus & Naifeh], 551  
    volume  
        and systolic pressure variation (OA) [Perel, Pizov & Cotev], 498

Blood flow, *See under* Brain  
Blood pressure  
    baroreceptor reflexes  
        effects of droperidol on, in humans (OA) [Balagny, Gauzit, Marty, Couderc, Levron & Desmonts], 473  
    central-peripheral gradient  
        in possibility of A-V shunting upon cardiopulmonary bypass discontinuation (CR) [Pauca & Meredith], 91  
    drug effects  
        hypertension  
            pretreatment with clonidine (EV) [Longnecker], 1  
        and EEG spectral edge frequency changes in laryngoscopy and intubation (CR) [Rampil & Matteo], 139  
    hypertension  
        anesthesia and, effect of clonidine on perioperative hemodynamics and isoflurane requirements (OA) [Ghignone, Calvillo & Quintin], 3  
        postoperative, intravenous labetalol for treatment of (CR) [Leslie, Kalayjian, Sirgo, Plachetka & Watkins], 413  
    hypovolemia  
        systolic pressure variation as indicator of, in graded hemorrhage (OA) [Perel, Pizov & Cotev], 498  
    left atrial  
        measurement of: surprisingly complex problem (EV) [Teplick], 289  
    mean arterial, *See under* Hemodynamics  
    measurement  
        in possibility of A-V shunting upon cardiopulmonary bypass discontinuation (CR) [Pauca & Meredith], 91  
    pulmonary artery  
        measurement of: surprisingly complex problem (EV) [Teplick], 289  
    right atrial  
        measurement of: surprisingly complex problem (EV) [Teplick], 289  
    systolic  
        as indicator of hypovolemia in ventilated dogs subjected to graded hemorrhage (OA) [Perel, Pizov & Cotev], 498  
    *See also under* Monitoring; Pediatrics  
Book reviews  
    Bready, and Smith, *Decision Making in Anesthesiology*, 615  
    DeKornfeld, T. J. (ed.), *Anesthesiology: A Concise Textbook*, 871  
    Gelman, S., *Anesthesia and Organ Transplantation*, 871  
    Howland, Rooney, and Goldiner (eds.), *Manual of Anesthesia in Cancer Care*, 451  
    Katz, J., and Steward, D. J., (eds.), *Anesthesia and Uncommon Pediatric Disease*, 616  
    Levy, J. M., *Anaphylactic Reactions in Anaesthesia and Intensive Care*, 450  
    Lunn, J. N. (ed.), *Epidemiology in Anesthesia: The Techniques of Epidemiology Applied to Anesthetic Practice*, 450  
    Nuwer, M. R. (ed.), *Evoked Potential Monitoring in the Operating Room*, 873  
    Petty, C. (ed.), *The Anesthesia Machine*, 872  
    Shnider, S. M. (ed.), *Anesthesia for Obstetrics*, 2nd edition, 615  
    Snyder, J. V., and Pinsky, M. R., *Oxygen Transport in the Critically Ill*, 614  
    Taylor, K. M., *Cardiopulmonary Bypass*, 450  
    Wu, W-H. (ed.), *Pain Management: Assessment and Treatment of Acute and Chronic Syndromes*, 614  
Bradycardia, *See under* Complications  
Brain  
    ACTH  
        and inhibition of stress-induced beta-endorphin secretion by his-

- tamine receptor antagonists (CO) [Bach, Knigge & Warberg], 605
- anesthetic uptake and elimination**
- of halothane, in rat brain, with fluorine nuclear magnetic resonance spectroscopy (OA) [Litt, González-Méndez, James, Sessler, Mills, Chew, Moseley, Pereira, Severinghaus & Hamilton], 161
- beta-endorphin**
- stress-induced, inhibition of secretion of, by histamine receptor antagonists (CO) [Bach, Knigge & Warberg], 605
- biochemistry**
- high-energy metabolites**
- new techniques, new opportunities, old problems (EV) [Smith & Chance], 157
- lactate**
- new techniques, new opportunities, old problems (EV) [Smith & Chance], 157
- blood flow**
- in changes in plasma osmolality and oncotic pressure (OA) [Zornow, Todd & Moore], 936
- effect of halothane on, in fetal lamb *in vitro* (OA) [Cheek, Hughes, Dailey, Field, Pytko, Rosen, Parer & Shnider], 361
- effect of lidocaine on, in dogs anesthetized with isoflurane (OA) [Milde & Milde], 180
- and effects of fentanyl and midazolam in young and aged rats (OA) [Baughman, Hoffman, Albrecht & Miletich], 314
- and pharmacologic EEG suppression during cardiopulmonary bypass (OA) [Woodcock, Murkin, Farrar, Tweed, Guiraudon & McKenzie], 218
- regional**
- effect of nimodipine on, in rat (OA) [Young, Josovitz, Morales & Chien], 54
- blood volume**
- is increased in dogs during administration of nitrous oxide or isoflurane (OA) [Archer, Labrecque, Tyler, Meyer & Trop], 642
- central nervous system**
- depression**
- from epidural fentanyl for extracorporeal shock wave lithotripsy (CR) [Wells & Davies], 991
- electroconvulsive therapy—1987 and (RA) [Selvin], 367
- excitation**
- during exposure to isoflurane, enflurane, and halothane in mice (LR) [Komatsu & Ogli], 771
- cryogenic injury**
- intracranial pressure effects of isoflurane and halothane following (OA) [Scheller, Todd, Drummond & Zornow], 507
- damage**
- hypoxia**
- magnetic resonance spectroscopy in (EV) [Smith & Chance], 157
- ischemia**
- magnetic resonance spectroscopy in (EV) [Smith & Chance], 157
- disinhibition**
- during exposure to isoflurane, enflurane, and halothane in mice (LR) [Komatsu & Ogli], 771
- edema**
- in changes in plasma osmolality and oncotic pressure (OA) [Zornow, Todd & Moore], 936
- electroencephalogram**
- and isoflurane to decrease frequency of cerebral ischemia during carotid endarterectomy (OA) [Michenfelder, Sundt, Fode & Sharbrough], 336
- in lidocaine dosage in dogs anesthetized with isoflurane (OA) [Milde & Milde], 180
- in study of cerebral vascular and metabolic effects of fentanyl and midazolam in young and aged rats (OA) [Baughman, Hoffman, Albrecht & Miletich], 314
- electroencephalography**
- during exposure to isoflurane, enflurane, and halothane in mice (LR) [Komatsu & Ogli], 771
- fluorine**
- nuclear magnetic resonance spectroscopy, study of halothane uptake and elimination in rat brain (OA) [Litt, González-Méndez, James, Sessler, Mills, Chew, Moseley, Pereira, Severinghaus & Hamilton], 161
- glucose utilization**
- regional**
- effect of nimodipine on, in rat (OA) [Young, Josovitz, Morales & Chien], 54
- hemiplegia**
- sensitivity of adductor pollicis and diaphragm muscles to atracurium in (CR) [Laycock, Smith, Donati & Bevan], 851
- hemorrhage**
- perianesthetic, in preterm neonates (CR) [Friesen, Honda & Thieme], 814
- hypothalamus**
- and core temperature changes during N<sub>2</sub>O fentanyl and halothane/O<sub>2</sub> anesthesia (CR) [Sessler, Rubinstein & Eger], 137
- in vivo* <sup>19</sup>F nuclear magnetic resonance study of isoflurane elimination from, in rabbit (OA) [Mills, Sessler, Moseley, Chew, Pereira, James & Litt], 169
- intracranial pressure**
- in changes in plasma osmolality and oncotic pressure (OA) [Zornow, Todd & Moore], 936
- and craniotomy in patient with bronchopleural fistula (CR) [Gutstein & Koblin], 804
- effects of isoflurane and halothane following cryogenic brain injury (OA) [Scheller, Todd, Drummond & Zornow], 507
- hypocapnia and, during halothane or nitrous oxide (OA) [Artru & Hornbein], 66
- is increased in dogs during administration of nitrous oxide or isoflurane (OA) [Archer, Labrecque, Tyler, Meyer & Trop], 642
- succinylcholine-induced, "defasciculation" with metocurine prevents (OA) [Stirt, Grosslight, Bedford & Vollmer], 50
- ischemia**
- effect of nimodipine on, in rat (OA) [Young, Josovitz, Morales & Chien], 54
- lactate**
- and reevaluation of intraoperative glucose use (MI) [Sieber, Smith, Traystman & Wollman], 72
- metabolic rate oxygen**
- effect of halothane on, in fetal lamb *in vitro* (OA) [Cheek, Hughes, Dailey, Field, Pytko, Rosen, Parer & Shnider], 361
- metabolism**
- effect of lidocaine on, in dogs anesthetized with isoflurane (OA) [Milde & Milde], 180
- and effects of fentanyl and midazolam in young and aged rats (OA) [Baughman, Hoffman, Albrecht & Miletich], 314
- opisthotonus**
- during exposure to isoflurane, enflurane, and halothane in mice (LR) [Komatsu & Ogli], 771
- oxygen consumption**
- effect of lidocaine on, in dogs anesthetized with isoflurane (OA) [Milde & Milde], 180

- and pharmacologic EEG suppression during cardiopulmonary bypass (OA) [Woodcock, Murkin, Farrar, Tweed, Guiraudon & McKenzie], 218
- protection
  - and isoflurane to decrease frequency of cerebral ischemia during carotid endarterectomy (OA) [Michenfelder, Sundt, Fode & Sharbrough], 336
- stroke
  - sensitivity of adductor pollicis and diaphragm muscles to atracurium in (CR) [Laycock, Smith, Donati & Bevan], 851
- Bready, and Smith
  - Decision Making in Anesthesiology* (BR), 615
- Bronchopleural fistula, *See under Lung(s)*
- Buffer, *See under Acid-base equilibrium*
- Bulimia, *See under Complications*
- Bupivacaine, *See under Anesthetics, local*
- Burns, *See under Complications*

C

- Calcium blocking drugs, *See under Pharmacology*
- Calcium channel blockers
  - verapamil
    - and isoflurane, causes regional left-ventricular dyssynchrony in dog (OA) [Videcoq, Arvieux, Ramsay, Foëx, Stone, Ryder & Jones], 635
- Calcium citrate, *See under Ions*
- Calcium entry blockers
  - nimodipine
    - effect of, on post-ischemic cerebral glucose utilization and blood flow in rat (OA) [Young, Josovitz, Morales & Chien], 54
- See also under Pharmacology*
- Calcium, *See under Ions*
- Cannula, *See under Equipment*
- Carbon dioxide
  - absorption
    - soda lime
      - stability of sevoflurane in (LR) [Strum, Johnson & Eger], 779
  - elimination, separate lung blood flow in anesthetized dogs (LR) [Carlsson, Hedenstierna, Blomqvist & Strandberg], 240
  - extracorporeal elimination
    - treatment of acute respiratory failure by, with artificial lung (CR) [Bindsvle, Eklund, Norlander, Swedenborg, Olsson, Nilsson, Larm, Gouda, Malmberg & Scholander], 117
  - hypocapnia
    - prolonged, does not alter rate of cerebrospinal fluid production during halothane or nitrous oxide (OA) [Artru & Hornbein], 66
  - production
    - and reevaluation of intraoperative glucose use (MI) [Sieber, Smith, Traystman & Wollman], 72
- Carbon dioxide response, *See under Ventilation*
- Cardiac anesthesia, *See under Anesthesia*
- Cardiac contractility, *See under Heart*
- Cardiac muscle, *See under Heart; Muscle*
- Cardiac output, *See under Heart; Hemodynamics*
  - measurement of, *See under Measurement techniques*
- Cardiac surgery, *See under Surgery*
- Cardiopulmonary bypass, *See under Surgery, cardiac*
- Cardiovascular anesthesia, *See under Anesthesia*
- Cardiovascular effects of ions, *See under Ions*
- Cardiovascular hemodynamics, *See under Hemodynamics*
- Carotid endarterectomy, *See under Surgery*
- Catecholamines, *See under Sympathetic nervous system; Hormones*
- Caudal anesthesia, *See under Anesthetic techniques*
- Celiac plexus block, *See under Anesthetic techniques*
- Central nervous system, *See under Brain*
- Central venous pressure, *See under Monitoring*
- Central-peripheral gradient, *See under Blood pressure*
- Cerebral blood flow, *See under Brain*
- Cerebral hemorrhage, *See under Brain*
- Cerebral metabolic rate of oxygen, *See under Brain*
- Cerebral metabolism, *See under Brain*
- Cerebrospinal fluid
  - pressure
    - hypocapnia and, during halothane or nitrous oxide (OA) [Artru & Hornbein], 66
  - production
    - hypocapnia and, during halothane or nitrous oxide (OA) [Artru & Hornbein], 66
  - volume
    - hypocapnia and, during halothane or nitrous oxide (OA) [Artru & Hornbein], 66
- Cesarean section, *See under Anesthesia, obstetric*
- Chlordiazepoxide, *See under Hypnotics, benzodiazepines*
- Chlorisondamine, *See under Pharmacology, ganglionic blocking drugs*
- Chlorobutanol, *See under Preservatives*
- Cholinesterase, *See under Enzymes*
- Chromatography
  - gas, *See under Measurement techniques*
- Circuits, *See under Equipment*
- Circulation
  - heart rate
    - and minimum alveolar concentration of isoflurane in preterm neonates (OA) [Le Dez & Lerman], 301
  - hypotension
    - and minimum alveolar concentration of isoflurane in preterm neonates (OA) [Le Dez & Lerman], 301
  - systolic arterial pressure
    - and minimum alveolar concentration of isoflurane in preterm neonates (OA) [Le Dez & Lerman], 301
- Circumcision, *See under Surgery*
- Cirrhosis, *See under Toxicity*
- Clearance of anesthetics, *See under Anesthetics*
- Clinical research, *See under Research*
- Clonidine, *See under Pharmacology; Potency, anesthetic; Sympathetic nervous system, alpha adrenergic agonist; Premedication; sympatholytic agents*
- Closed circuit anesthesia, *See under Anesthesia*
- Coagulation, *See under Blood*
- Collateral blood flow, *See under Heart*
- Colloid oncotic pressure, *See under Fluid balance*
- Colloids, *See under Fluid balance*
- Complications
  - adverse outcomes
    - effects of information feedback and pulse oximetry on (OA) [Cooper, Cullen, Nemeskai, Hoaglin, Gevirtz, Csete & Venable], 686
- AIDS
  - HTLV-III is now HIV (CO) [Freedman], 145
  - HTLV-III is now HIV (CO) [Kunkel & Warner], 146
  - preoperative testing for human immunodeficiency virus infection (CO) [Bazaral], 278

- preoperative testing for human immunodeficiency virus infection (CO) [Kunkel & Warner], 278
- airway obstruction**  
and margin of safety in positioning modern double-lumen endotracheal tubes (OA) [Benumof, Partridge, Salvatierra & Keating], 729
- akathisia**  
reaction of preoperative metoclopramide (CR) [Caldwell, Rains & McKiterick], 854
- anaphylaxis**  
reaction to protamine, laboratory test to detect (CO) [Levy], 281
- anesthesia**  
incidence of, effects of information feedback and pulse oximetry on (OA) [Cooper, Cullen, Nemeskai, Hoaglin, Gevirtz, Csete & Venable], 686
- anesthesia machine failure**  
prevention of hypoxic gas mixtures in (CO) [Herbst], 281
- apnea**  
in general anesthesia in upper respiratory tract infections in children (OA) [Tait & Knight], 930  
following intravenous guanethidine Bier block (CO) [Woo & McQueen], 281
- Arnold-Chiari malformation**  
type I  
appearing after tonsillectomy (CR) [Dong], 120
- asphyxia**  
fetal  
effect of halothane on (OA) [Cheek, Hughes, Dailey, Field, Pytko, Rosen, Parer & Shnider], 361
- aspiration**  
in continuous hypopharyngeal pH during anesthesia *via* mask (CR) [Kofke, Fasano, Keamy & Derr], 434  
hydrochloric acid, effect of nitroprusside on pulmonary edema in (OA) [Gottlieb, Wood, Hansen & Long], 203
- asystole**  
in patients receiving diltiazem therapy during enflurane anesthesia (CR) [Hantler, Wilton, Learned, Hill & Knight], 94
- atlanto-axial subluxation**  
and trisomy-21: perioperative complications (CR) [Williams, Somerville, Miner & Reilly], 253
- behavioral abnormalities**  
as reaction to preoperative metoclopramide (CR) [Caldwell, Rains & McKiterick], 854
- bradycardia**  
in patients receiving diltiazem therapy during enflurane anesthesia (CR) [Hantler, Wilton, Learned, Hill & Knight], 94
- burns**  
erosion, and "sun" tan with use of pulse oximetry in infants (CR) [Miyasaka & Ohata], 1008
- central nervous system depression**  
from epidural fentanyl for extracorporeal shock wave lithotripsy (CR) [Wells & Davies], 991
- Duchenne muscular dystrophy**  
effects of bupivacaine during epidural anesthesia in (CR) [Murat, Esteve, Montay, Delleur, Gaudiche & Saint-Maurice], 249  
following halothane anesthesia without succinylcholine (CR) [Rubiano, Chang, Carroll, Sonbolian & Larson], 856
- dysrhythmias**  
in general anesthesia in upper respiratory tract infections in children (OA) [Tait & Knight], 930  
intraoperative cardiac, in bulimic anorexia nervosa (CR) [Arnold, Rose & Stoddard], 1003  
ventricular, midazolam-induced (CO) [Arcos], 612
- endobronchial intubation**  
in children: tube bevel and side of intubation (CO) [Baraka, Akel & Muallem], 869
- epidermolysis bullosa**  
regional anesthesia in child with (CR) [Kaplan & Strauch], 262
- explosions**  
involving endotracheal tubes in oxygen and nitrous oxide enriched atmosphere (LR) [Wolf & Simpson], 236
- eye damage**  
from reusable masks (CO) [Durkan & Fleming], 444
- fires**  
involving endotracheal tubes in oxygen and nitrous oxide enriched atmosphere (LR) [Wolf & Simpson], 236
- foreign body**  
from tube of anesthetic ointment (CO) [Gray], 155  
from tube of anesthetic ointment (CO) [Jackson & Welch], 154
- hepatotoxicity**  
from halogenated anesthetics in phenobarbital-treated rats (OA) [Becker, Miletich & Albrecht], 185
- human immunodeficiency virus**  
HTLV-III is now referred to as (CO) [Freedman], 145  
HTLV-III is now referred to as (CO) [Kunkel & Warner], 146
- hypertension**  
postoperative, intravenous labetalol for treatment of (CR) [Leslie, Kalayjian, Sirgo, Plachetka & Watkins], 413
- hyperthermia**  
susceptibility in neuroleptic malignant syndrome (OA) [Caroff, Rosenberg, Fletcher, Heiman-Patterson & Mann], 20
- hypocalcemia**  
and prolonged QT interval following carotid artery surgery (CR) [Zane, Eisenkraft & Haimov], 998
- hypotension**  
effects of information feedback and pulse oximetry on incidence of (OA) [Cooper, Cullen, Nemeskai, Hoaglin, Gevirtz, Csete & Venable], 686  
histamine release by vancomycin as mechanism for (CR) [Levy, Kettlekamp, Goertz, Hermens & Hirshman], 122  
maternal, effects of, during epidural anesthesia for cesarean section (CR) [Brizgys, Dailey, Shnider, Kotenko & Levinson], 782  
during total knee replacement surgery with total condylar prosthesis (CR) [Tartiere, Berthelin, Jehan, Trahay, Samii & Quesnel], 838
- inadvertent cannulation of aberrant radial artery (CO) [Westover], 610**
- intravascular injection**  
test dose as safeguard against, in epidural analgesia (CR) [Van Zundert, Vaes, Soetens, De Vel, Van Der Aa, Van Der Donck, Meeuwis & DeWolf], 436
- laryngospasm**  
in general anesthesia in upper respiratory tract infections in children (OA) [Tait & Knight], 930
- masseter spasm**  
and effects of succinylcholine on mouth opening (OA) [Van Der Spek, Fang, Ashton-Miller, Stohler, Carlson & Schork], 459
- myocardial dysfunction**  
in nitrous oxide after coronary air embolism (OA) [Tuman, McCarthy, Spiess, Overfield & Ivankovich], 952
- myoclonus**  
following sufentanil without EEG seizure activity (CR) [Bowdle], 593
- near-drowning**  
succinylcholine-induced hyperkalemia in (CO) [Tong], 605  
succinylcholine-induced hyperkalemia in (CO) [Zauder], 604

- neurologic  
  during sedation in cervical spondylosis (CR) [Miller, Crosby & Sundaram], 844
- neurologic deficit  
  on emergence from anesthesia (CR) [Oliver, Cucchiara, Warner & Muir], 823
- nitrous oxide and oxygen indices of flammability  
  of endotracheal tubes (LR) [Wolf & Simpson], 236
- pharyngeal edema  
  new laryngoscope blade to overcome (LR) [Bainton], 767
- pollution  
  associated with keyed filling devices (CO) [Williams, Dicks & Benson], 610
- postherpetic neuralgia  
  prevention of (CO) [Bauman], 441  
  prevention of (CO) [Yanagida & Suwa], 441
- postoperative confusion  
  in elderly (CR) [Chung, Meier, Lautenschlager, Carmichael & Chung], 422
- propofol *versus* thiopental for outpatient anesthesia (CR) [Johnston, Noseworthy, Anderson, Konopad & Grace], 431
- pulmonary artery perforation  
  balloon inflation and deflation as influence on (CR) [Johnston, Royster, Vinten-Johansen, Gravlee, Howard, Mills & Tucker], 110
- pulmonary edema  
  intraoperative re-expansion (CR) [Disederio, Meister & Bedford], 821
- pulmonary hypertension  
  left atrial injection of protamine does not reliably prevent (CR) [Kronenfeld, Garguilo, Weinberg, Grant, Thomas & Turndorf], 578
- rhabdomyolysis  
  following halothane anesthesia without succinylcholine (CR) [Rubiano, Chang, Carroll, Sonbolian & Larson], 856
- rigidity  
  ketanserin pretreatment reverses alfentanil-induced (OA) [Weinger, Cline, Smith & Koob], 348
- thrombosis  
  lethal, during coronary artery bypass graft surgery (CR) [Litwack & Horrow], 134
- torticollis  
  acquired  
    appearing after tonsillectomy (CR) [Dong], 120
- trisomy-21 syndrome  
  and atlanto-axial subluxation: perioperative complication (CR) [Williams, Somerville, Miner & Reilly], 253
- upper airway obstruction  
  new laryngoscope blade to overcome (LR) [Bainton], 767
- Computed tomography, *See under* Measurement techniques
- Computer, *See under* Equipment
- Computerized EEG, *See under* Monitoring
- Computerized monitoring, *See under* Measurement techniques
- Conduction block, *See under* Nerve(s)
- Confusion, postoperative, *See under* Complications
- Congenital heart disease, *See under* Heart
- Conjoined twins, *See under* Twins
- Consent, *See under* Medicolegal
- Continuous infusion, *See under* Anesthetic techniques
- Contracture test, *See under* Hyperthermia, malignant
- Controlled ventilation, *See under* Ventilation
- Coronary arteries, *See under* Arteries; Heart
- Coronary artery disease, *See under* Heart
- Coronary artery steal, *See under* Arteries
- Coronary embolism, *See under* Embolism
- Coronary occlusion, *See under* Heart
- Cortisol, *See under* Hormones
- Cpss50, *See under* Pharmacodynamics
- Creatine kinase, *See under* Enzymes
- Creatinine clearance, *See under* Kidney
- Critical care, *See under* Intensive care
- Critical care unit  
  midazolam infusion in, for sedation following cardiac surgery (CR) [Westphal, Cheng, White, Sladen, Rosenthal & Sung], 257
- Cryogenic injury, *See under* Brain
- Crystalloids, *See under* Fluid balance
- Cyanosis, *See under* Heart
- D**
- Damage, cerebral, *See under* Brain
- Degradation of anesthetics, *See under* Anesthetics
- DeKornfeld, T. J.  
  *Anesthesiology: A Concise Textbook* (BR), 871
- Depth of anesthesia, *See under* Anesthesia; Pharmacodynamics
- Desensitization block, *See under* Neuromuscular relaxants
- Dextran, *See under* Transfusion
- Diaphragm, *See under* Muscle
- Diazoxide, *See under* Metabolism
- Differential nerve block, *See under* Nerve(s)
- Diltiazem, *See under* Pharmacology
- Disinhibition, *See under* Brain
- Distribution, *See under* Immune response
- Disulfiram, *See under* Sympathetic nervous system, sympatholytic agents
- Doppler echocardiography, *See under* Measurement techniques
- Double-lumen tubes, *See under* Equipment
- Drapes, *See under* Equipment
- Droperidol, *See under* Anesthetics, intravenous
- Drug interactions, *See under* Interactions (drug)
- Dual block, *See under* Neuromuscular relaxants
- Duchenne muscular dystrophy, *See under* Complications
- Dysrhythmias, *See under* Complications
- E**
- Echocardiography, *See under* Measurement techniques; Monitoring
- ED<sub>50</sub>, *See under* Potency, anesthetic
- Edema, *See under* Brain
- Edrophonium, *See under* Antagonists, neuromuscular relaxants
- Elderly, *See under* Age factors
- Electrical systems  
  electrocautery  
    and flammability of endotracheal tubes (LR) [Wolf & Simpson], 236  
  electroconvulsive therapy  
    in 1987 (RA) [Selvin], 367
- Electrocardiography, *See under* Heart; Monitoring
- Electrocautery, *See under* Electrical systems
- Electroconvulsive therapy, *See under* Electrical systems
- Electroencephalogram, *See under* Brain
- Electroencephalography, *See under* Brain; Monitoring
- Electromechanical coupling, *See under* Heart
- Electromyography, *See under* Measurement techniques
- Electrophysiology, *See under* Nerve(s)
- Elimination of anesthetics, cerebral, *See under* Brain

**Elimination of anesthetics, See under Anesthetics****Embolism****air**

associated with veno-venous bypass during orthotopic liver transplantation (CR) [Khoury, Mann, Porot, Abdul-Rasool & Busutil], 848

during cesarean section, central venous pressure monitoring and (CO) [Robinson, Bunegin & Albin], 147

during cesarean section, central venous pressure monitoring and (CO) [Rupp], 146

**coronary**

effects of nitrous oxide on coronary perfusion after (OA) [Tuman, McCarthy, Spiess, Overfield & Ivankovich], 952

introducer sheath malfunction producing (CR) [Cohen, Mark, Morris & Frank], 573

is EEG a useful monitor during cardiac surgery? (CR) [El-Fiki & Fish], 575

venous, during craniectomy in supine infants (CR) [Harris, Yemen, Davidson, Strafford, Rowe, Sanders & Rockoff], 816

venous, effects of halothane and pentobarbital on threshold of transpulmonary passage of (OA) [Yahagi & Furuya], 905

**coronary****air**

effects of nitrous oxide on coronary perfusion after (OA) [Tuman, McCarthy, Spiess, Overfield & Ivankovich], 952

**End-diastolic volume, See under Heart****Endobronchial intubation, See under Anesthetic techniques; Complications; Intubation****Endocrine stress response, See under Hormones****Endothelium, See under Arteries****Endotracheal intubation, See under Intubation****Endotracheal tube monitoring lumens, See under Equipment****Endotracheal tubes, See under Equipment****End-tidal concentration, See under Monitoring****Enflurane, See under Anesthetics, volatile****Enzyme induction, See under Metabolism****Enzymes****cholinesterase**

serum, atypical, eliminated by orthotopic liver transplantation (CR) [Khoury, Brill, Walts & Busutil], 273

**creatine kinase**

and mechanism of negative inotropic action of halothane (OA) [Murray, Blanck, Rogers & Jacobus], 649

**plasma cholinesterase**

and succinylcholine neuromuscular blockade, effect of quinidine on (CR) [Kambam, Franks, Naukam & Sastry], 858

**Ephedrine, See under Sympathetic nervous system, sympathomimetic agents****Epidermolysis bullosa, See under Complications****Epidural analgesia, See under Analgesia****Epidural anesthesia, See under Anesthetic techniques****Epidural narcotic anesthesia, See under Anesthetic techniques****Epiglottitis, See under Airway****Epinephrine, See under Sympathetic nervous system, catecholamines****Equipment****anesthesia machine**

malfunction, and prevention of hypoxic gas mixtures (CO) [Herbst], 281

**anesthetic****design**

to overcome pharyngeal obstruction (LR) [Bainton], 767

**anesthetic ointment**

foreign body from tube of (CO) [Jackson & Welch], 154

**automatic blood pressure**

use of different cuffs with Dinamap™, caution in (CO) [Peterson], 607

**cannula****translaryngeal**

in Gildar's transtracheal ventilation system (CO) [Reich & Schwartz], 446

in Gildar's transtracheal ventilation system (CO) [Sosis], 446  
for transtracheal oxygenation system, problem with (CO) [Goldman & Braude], 447

for ventilation: continuing misconceptions (CO) [Yealy & Stewart], 445

**circuits****Bain**

the CPAP oxygenation during one-lung ventilation, high pressure pop-off safety device when using (CO) [Hensley, Martin & Skeehan], 863

**computer(s)**

for accurate, automated, continuously displayed pulmonary artery pressure measurement (OA) [Mitchell, Meathe, Jones, Donch, Ricks, Benumof & Saidman], 294

central vascular pressures measured by (EV) [Teplick], 289

**drapes**

for sterile field in regional anesthesia (CO) [Ellermeyer], 150

**endotracheal tubes**

correlation of size of, with sore throat and hoarseness following general anesthesia (CR) [Stout, Bishop, Dwersteg & Cullen], 419

flammability of, in oxygen and nitrous oxide enriched atmosphere (LR) [Wolf & Simpson], 236

**with monitoring lumens**

problems associated with, in pediatric patients (CO) [Miller], 1018

problems associated with, in pediatric patients (CO) [Wiegert], 1019

without radiopaque marker for cervical CT-scans (CO) [Tashiro & Yagi], 1022

**fiberoptic bronchoscope**

another use of (CO) [Stone], 608

foreign body from tube of (CO) [Gray], 155

**introducer sheath**

malfunction producing insidious air embolism (CR) [Cohen, Mark, Morris & Frank], 573

**keyed filling devices**

pollution associated with (CO) [Williams, Dicks & Benson], 610

**laryngoscope****blade**

to overcome pharyngeal obstruction (LR) [Bainton], 767

for management of difficult airway (CO) [Coveler], 154

**mask(s)**

continuous hypopharyngeal pH during anesthesia via (CR) [Kofke, Fasano, Keamy & Derr], 434

reusable, potential eye damage from (CO) [Durkan & Fleming], 444

**mass spectrometer**

sampling system, one-way leak in (CO) [Koeber & Munster], 606

**monitoring**

for accurate, automated, continuously displayed pulmonary artery pressure measurement (OA) [Mitchell, Meathe, Jones, Donch, Ricks, Benumof & Saidman], 294

**See also under Monitoring****monitor(s)****fetal**

modification of, as hazardous (CO) [Sand], 448

needle(s)  
Tuohy, misspelling of word (CO) [Clark], 612  
Tuohy, misspelling of word (CO) [Saidman], 612  
oximeters  
accuracy of response of, to profound hypoxia (LR) [Severinghaus & Naifeh], 551  
PEEP valve  
for use with Bain circuit for CPAP oxygenation during one-lung ventilation (CO) [Hensley, Martin & Skeehan], 863  
pneumatic compression device  
hemodynamic effects of (CR) [Unger & Feiner], 266  
pulse oximeter(s)  
ambient light affects (CO) [Hanowell, Eisele & Downs], 864  
ambient light affects (CO) [Swedlow, Running & Feaster], 865  
dyes and (CO) [Eide, Humayun-Scott & Poppers], 149  
dyes and (CO) [Unger & Scheller], 148  
reuse of Nellcor pulse probe with (CO) [Kao & Badgwell], 866  
stethoscope  
precordial  
method of securing head of (CO) [Welsh], 280  
stethoscopic transmitter  
inexpensive (CO) [Redon & DeTraglia], 283  
tourniquet  
and hemodynamic changes during total knee replacement surgery with total condylar prosthesis (CR) [Tartiere, Berthelin, Jehan, Trahay, Samii & Quesnel], 838  
release, metabolic responses to, in children (CR) [Brustowicz, Moncorge & Koka], 792  
tubes  
double-lumen  
endotracheal, margin of safety in positioning (OA) [Benumof, Partridge, Salvatierra & Keating], 729  
Esophageal sphincter  
lower, *See under* Gastrointestinal  
Etomidate, *See under* Anesthetics, intravenous  
Evoked potentials, *See under* Monitoring  
Exercise test, *See under* Hyperthermia  
Explosions, *See under* Complications  
Eye(s)  
damage  
potential, from reusable masks (CO) [Durkan & Fleming], 444  
intraocular pressure  
changes during muscular hyperactivity after general anesthesia (CO) [Grover, Mahajan & Sharma], 604  
changes during muscular hyperactivity after general anesthesia (CO) [Williams], 604

## F

<sup>19</sup>F, *See under* Ions  
Fasciculations, *See under* Muscle skeletal  
Fentanyl, *See under* Analgesics, narcotic; Anesthetics, intravenous  
Fetal monitor, *See under* Equipment  
Fiberoptic bronchoscope, *See under* Equipment  
Fiberoptic bronchoscopy, *See under* Anesthetic techniques  
Fiberoptic intubation, *See under* Intubation  
Fires, *See under* Complications  
Flammability  
indices, *See under* Complications  
Flow proportional admixture, *See under* Lung(s)  
Fluid balance  
colloid oncotic pressure  
and osmolality, changes in, acute cerebral effects of (OA) [Zornow, Todd & Moore], 936

colloids  
and plasma oncotic pressure, changes in, acute cerebral effects of (OA) [Zornow, Todd & Moore], 936  
crystalloids  
and plasma oncotic pressure, changes in, acute cerebral effects of (OA) [Zornow, Todd & Moore], 936  
hetastarch  
and plasma oncotic pressure, changes in, acute cerebral effects of (OA) [Zornow, Todd & Moore], 936  
osmolality  
and plasma oncotic pressure, changes in, acute cerebral effects of (OA) [Zornow, Todd & Moore], 936  
Fluorine, *See under* Brain  
Fluphenazine, *See under* Ataractics, phenothiazines  
Foreign body, *See under* Airway; Complications  
Formaldehyde, *See under* Preservatives  
Free fatty acids, *See under* Metabolism  
Frequency-dependent block, *See under* Nerve(s)  
Functional residual capacity, *See under* Lung(s)

## G

Ganglionic blocking drugs, *See under* Pharmacology  
Gas chromatography, *See under* Measurement techniques  
Gas exchange, *See under* Anesthesia  
Gases  
nonanesthetic  
sulphur hexafluoride  
elimination, separate lung blood flow in anesthetized dogs (LR) [Carlsson, Hedenstierna, Blomqvist & Strandberg], 240  
Gastric pH versus H<sup>+</sup>, *See under* Acid-base equilibrium  
Gastrointestinal tract  
antacids  
during surgery in obstetric and gynecologic patients (CR) [Faure, Lim, Block, Tan & Roizen], 274  
esophageal sphincter  
lower  
pressure in, in infants and children, intravenous atropine rapidly reduces (CR) [Opie, Chaye & Steward], 989  
pH  
sodium bicarbonate buffers gastric acid during surgery in obstetric and gynecologic patients (CR) [Faure, Lim, Block, Tan & Roizen], 274  
Gelman, S.  
*Anesthesia and Organ Transplantation* (BR), 871  
General anesthesia, *See under* Anesthesia  
Geriatrics, *See under* Age factors  
Glucose  
blood, *See under* Blood  
metabolism, *See under* Metabolism  
*See under* Blood; Metabolism  
utilization, *See under* Brain  
Glycogen, *See under* Metabolism  
Guanethidine, *See under* Sympathetic nervous system  
Guinea pigs, *See under* Species

## H

Halothane, *See under* Anesthetics, volatile  
Heart  
action potential  
and halothane and ischemia related arrhythmias (OA) [Turner, Bosnjak & Kampine], 619  
halothane: cause or cure for arrhythmias? (EV) [Atlee], 617  
arrhythmias  
following edrophonium/atropine mixture for antagonism of neu-

- romuscular blockade (CR) [Urquhart, Ramsey, Royster, Morell & Gerr], 561
- halothane: cause or cure for arrhythmias? (EV) [Atlee], 617
- ischemia related, halothane and (OA) [Turner, Bosnjak & Kampine], 619
- blood flow**
- collateral**
- effects of isoflurane and halothane on, capacity to induce coronary steal (OA) [Cason, Verrier, London, Mangano & Hickey], 665
- myocardial**
- effects of isoflurane and halothane on, capacity to induce coronary steal (OA) [Cason, Verrier, London, Mangano & Hickey], 665
- peripheral**
- in infants, caudal anesthesia and (OA) [Payen, Ecoffey, Carli & Dubousset], 681
- cardiac output**
- and caudal anesthesia and blood flows in infants (OA) [Payen, Ecoffey, Carli & Dubousset], 681
- effect of nitroprusside on, in hydrochloric acid aspiration (OA) [Gottlieb, Wood, Hansen & Long], 203
- invasive *versus* 2D-echocardiography hemodynamic indices of (OA) [Thys, Hillel, Goldman, Mindich & Kaplan], 630
- congenital heart disease**
- and right-to-left cardiac shunt, influence on lidocaine pharmacokinetics on (OA) [Bokesch, Castaneda, Ziemer & Wilson], 739
- contractility**
- and pH effect of calcium uptake in presence volatile anesthetics (LR) [Casella, Suite, Fisher & Blanck], 386
- coronary artery disease**
- calcium entry blockers and  $\alpha$ -receptor responsiveness in (OA) [Massagee, McIntyre, Kates, Reves & Bai], 485
- is isoflurane dangerous for patient with? (CO) [Abramowitz], 286
- is isoflurane dangerous for patient with? (CO) [Becker], 287
- is isoflurane dangerous for patient with? (CO) [Hamilton], 286
- is isoflurane dangerous for patient with? (CO) [Merin], 284
- coronary occlusion**
- halothane inhibits calcium accumulation and calcium paradox following, in guinea pig hearts (OA) [Hoka, Bosnjak & Kampine], 197
- cyanosis**
- and right-to-left cardiac shunt, influence on lidocaine pharmacokinetics on (OA) [Bokesch, Castaneda, Ziemer & Wilson], 739
- dysrhythmias**
- effect of second dose of succinylcholine on, following induction of anesthesia with etomidate or midazolam (CR) [Abdul-Rasool, Sears & Katz], 795
- effects of short-term infusion of nifedipine or verapamil on, prior to coronary artery bypass surgery (OA) [Schulte-Sasse & Tar-now], 492
- electrocardiography**
- QT interval**
- prolongation of, in association with large doses of opiates (CO) [Blair, Pruett, Crumrine & Balser], 442
- electromechanical coupling**
- anesthetic depression of (RA) [Rusy & Komai], 745
- end-diastolic volume**
- invasive *versus* 2D-echocardiography hemodynamic indices of (OA) [Thys, Hillel, Goldman, Mindich & Kaplan], 630
- high-energy phosphates**
- effect of halothane on, in neonatal heart (LR) [McAuliffe & Hickey], 231
- idiopathic hypertrophic subaortic stenosis**
- epidural anesthesia for vaginal delivery a patient with (CR) [Min-nich, Quirk & Clark], 590
- inotropism**
- negative**
- in anesthetic depression of myocardial contractility (RA) [Rusy & Komai], 745
- ischemia**
- arrhythmias related to, halothane and (OA) [Turner, Bosnjak & Kampine], 619
- halothane: cause or cure for arrhythmias? (EV) [Atlee], 617
- nitrous oxide added to fentanyl does not induce, in ischemic heart disease (OA) [Cahalan, Prakash, Rulf, Cahalan, Mayala, Lurz, Rosseel, Lachitjaran, Siphanto, Gussenhoven & Roelandt], 925
- muscle**
- in anesthetic depression of myocardial contractility (RA) [Rusy & Komai], 745
- myocardial contractility**
- anesthetic depression of (RA) [Rusy & Komai], 745
- myocardial function**
- comparison of halothane and isoflurane on, pulsed Doppler and two-dimensional echocardiography in (OA) [Murray, Vandewalker, Matherne & Mahoney], 211
- in intermittent pneumatic compression of legs (CR) [Unger & Feiner], 266
- myocardial ischemia**
- halothane inhibits calcium accumulation and calcium paradox following, in guinea pig hearts (OA) [Hoka, Bosnjak & Kampine], 197
- myofibrils**
- anesthetic depression of (RA) [Rusy & Komai], 745
- negative inotropism**
- of halothane, mechanism of (OA) [Murray, Blanck, Rogers & Jacobus], 649
- oxygen consumption**
- and mechanism of negative inotropic action of halothane (OA) [Murray, Blanck, Rogers & Jacobus], 649
- regional ventricular function**
- dysynchrony in, isoflurane-verapamil causes, in dog (OA) [Vide-coq, Arvieux, Ramsay, Foëx, Stone, Ryder & Jones], 635
- shunt(s)**
- right-to-left**
- influence of, on lidocaine pharmacokinetics (OA) [Bokesch, Castaneda, Ziemer & Wilson], 739
- specific bradycardic agents**
- new therapeutic modality for anesthesiology (OA) [Riley, Gross, Kampine & Warltier], 707
- stroke volume**
- invasive *versus* 2D-echocardiography hemodynamic indices of (OA) [Thys, Hillel, Goldman, Mindich & Kaplan], 630
- surgery of, See under Surgery**
- ventricular function**
- in interaction between inhalational anesthetics and verapamil (OA) [Chelly, Hysing, Hill, Abernethy, Diewati, Doursout & Merin], 320
- Heart rate, See under Circulation**
- Heating, See under Temperature**
- Hemiplegia, See under Brain**



## Hemodynamics

### cardiac output

effect of halothane on, in anesthetized newborn lamb (OA) [Hershenson, O'Rourke, Schena & Crone], 174

### fetal

#### cardiovascular

effect of halothane on, in fetal lamb *in vitro* (OA) [Cheek, Hughes, Dailey, Field, Pytko, Rosen, Parer & Shnider], 361

#### cerebral blood flow

effect of halothane on, in fetal lamb *in vitro* (OA) [Cheek, Hughes, Dailey, Field, Pytko, Rosen, Parer & Shnider], 361

#### organ blood flow

effect of halothane on, in fetal lamb *in vitro* (OA) [Cheek, Hughes, Dailey, Field, Pytko, Rosen, Parer & Shnider], 361

### maternal

#### heart rate

effect of halothane on, studied in ewe (OA) [Cheek, Hughes, Dailey, Field, Pytko, Rosen, Parer & Shnider], 361

#### mean arterial blood pressure

effect of halothane on, studied in ewe (OA) [Cheek, Hughes, Dailey, Field, Pytko, Rosen, Parer & Shnider], 361

#### uterine blood flow

effect of halothane on, studied in ewe (OA) [Cheek, Hughes, Dailey, Field, Pytko, Rosen, Parer & Shnider], 361

Hemorrhage, *See under Blood*

Hemorrhagic shock, *See under Shock*

Hepatotoxicity, *See under Complications; Liver; Toxicity*

Hetastarch, *See under Fluid balance*

High-energy metabolites, *See under Brain*

High-energy phosphates, *See under Heart*

High-frequency jet ventilation, *See under Ventilation*

High-risk surgery, *See under Surgery*

### Histamine

reaction from vecuronium priming (CR) [Durrani & O'Hara], 130

release by vancomycin: mechanism for hypotension in man (CR) [Levy, Kettlekamp, Goertz, Hermens & Hirshman], 122

### Hormones

#### antidiuretic

and antidiuretic effect of PEEP (CO) [Payen], 609

and antidiuretic effect of PEEP (CO) [Urzua], 608

#### catecholamines

effects of coronary artery bypass grafting and natural killer cell activity on (OA) [Tønnesen, Brinkløv, Christensen, Olesen & Madsen], 526

#### cortisol

effects of coronary artery bypass grafting and natural killer cell activity on (OA) [Tønnesen, Brinkløv, Christensen, Olesen & Madsen], 526

#### endocrine stress response

effects of coronary artery bypass grafting and natural killer cell activity on (OA) [Tønnesen, Brinkløv, Christensen, Olesen & Madsen], 526

#### insulin

##### excessive

treated by pancreatectomy, anesthesia for infant with (CR) [Yamashita & Tsuneto], 985

#### methylprednisolone

and epidural morphine for low-back pain (CR) [Dallas, Lin, Wu & Wolske], 408

Howland, Rooney, and Goldiner (eds.)

*Manual of Anesthesia in Cancer Care* (BR), 451

Human immunodeficiency virus, *See under Complications*

Hyperglycemia, *See under Metabolism*

Hyperinsulinemia, *See under Metabolism*

Hyperinsulinism, *See under Metabolism*

Hyperkalemia, *See under Ions, potassium*

Hypertension, *See under Blood pressure; Complications*

### Hyperthermia

as complication of extracorporeal shock wave lithotripsy (CO) [Malhotra], 448

#### exercise test

graded, effects of, on leg exchange of energy substrates in malignant hyperthermia susceptible subjects (OA) [Rutberg, Hakanson, Hall & Jorfeldt], 308

### malignant

#### contracture test

and fiber type in, no relationship between (LR) [Heiman-Patterson, Fletcher, Rosenberg & Tahmouh], 82

and effects of succinylcholine on mouth opening (OA) [Van Der Spek, Fang, Ashton-Miller, Stohler, Carlson & Schork], 459

#### fiber type

and halothane contracture test in, no relationship between (LR) [Heiman-Patterson, Fletcher, Rosenberg & Tahmouh], 82

and masseter spasm in children with strabismus anesthetized with halothane and succinylcholine (CR) [Carroll], 559

#### neuroleptic malignant syndrome

causes susceptibility to (OA) [Caroff, Rosenberg, Fletcher, Heiman-Patterson & Mann], 20

in renal transplant recipient (CR) [Byers & Merin], 979

#### skeletal muscle rigidity

tests of, in neuroleptic malignant syndrome (OA) [Caroff, Rosenberg, Fletcher, Heiman-Patterson & Mann], 20

susceptibility in neuroleptic malignant syndrome (OA) [Caroff, Rosenberg, Fletcher, Heiman-Patterson & Mann], 20

susceptibility to, effects of graded exercise on leg exchange of energy substrates in (OA) [Rutberg, Hakanson, Hall & Jorfeldt], 308

trismus presaging (EV) [Rosenberg], 453

*See also under Complications*

### Hypnotics

#### benzodiazepines

##### chlordiazepoxide

and muscle rigidity induced by alfentanil (OA) [Weinger, Cline, Smith & Koob], 348

receptor responses in aging (OA) [Baughman, Hoffman, Albrecht & Miletich], 314

#### midazolam

cerebral vascular and metabolic effects of, in young and aged rats (OA) [Baughman, Hoffman, Albrecht & Miletich], 314

Hypocalcemia, *See under Complications*

Hypocapnia, *See under Carbon dioxide*

Hypoglycemia, *See under Metabolism*

Hypopharynx, *See under Airway*

Hypotension, *See under Circulation; Complications*

Hypothalamus, *See under Brain; Temperature, regulation*

### Hypothermia

as complication of extracorporeal shock wave lithotripsy (CO) [Malhotra], 448

and core temperature changes during N<sub>2</sub>O fentanyl and halothane/O<sub>2</sub> anesthesia (CR) [Sessler, Rubinstein & Eger], 137

#### induced

and pharmacologic EEG suppression during cardiopulmonary bypass (OA) [Woodcock, Murkin, Farrar, Tweed, Guiraudon & McKenzie], 218

*See also under Temperature*

Hypovolemia, *See under Blood pressure*

### Hypoxia

#### pulmonary vascular response

high-dose almitrine bismesylate inhibits, in closed-chest dogs (OA)

[Chen, Miller, Malmkvist, Clergue, Marshall & Marshall], 534

#### pulmonary vasoconstriction

in anesthetized dogs, comparative study between electromagnetometry and SF<sub>6</sub> and CO<sub>2</sub> elimination (LR) [Carlsson, Hedenstierna, Blomqvist & Strandberg], 240

*See also under Lung(s)*

and serotonin metabolism at low pulmonary flow (OA) [Watkins & Rannels], 916

#### transient

profound, accuracy of response of six pulse oximeters to (LR) [Severinghaus & Naifeh], 551

and ventilation/perfusion lung scans to predict oxygenation during one-lung anesthesia (CR) [Hurford, Kolker & Strauss], 841

Hypoxia, *See under Brain; Metabolism; Oxygen*

### I

Ilioinguinal anesthesia, *See under Anesthetic techniques*

#### Immune response

##### distribution

and natural killer cell activity during coronary artery bypass grafting (OA) [Tønnesen, Brinkløv, Christensen, Olesen & Madsen], 526

##### lymphocyte function

and natural killer cell activity during coronary artery bypass grafting (OA) [Tønnesen, Brinkløv, Christensen, Olesen & Madsen], 526

##### natural killer cell activity

and natural killer cell activity during coronary artery bypass grafting (OA) [Tønnesen, Brinkløv, Christensen, Olesen & Madsen], 526

##### subpopulations

and natural killer cell activity during coronary artery bypass grafting (OA) [Tønnesen, Brinkløv, Christensen, Olesen & Madsen], 526

*In vitro* fertilization, *See under Anesthesia, obstetrics*

Induced hypothermia, *See under Hypothermia*

Induction anesthesia, *See under Anesthetic techniques*

Inert gas, *See under Measurement techniques*

Infants, *See under Anesthesia, pediatric; Surgery, pediatric*

preterm, *See under Age factors*

#### Infection

##### pulmonary

in children, effects of general anesthesia on (OA) [Tait & Knight], 930

##### upper respiratory tract

in children, effects of general anesthesia on (OA) [Tait & Knight], 930

##### viral

in children, effects of general anesthesia on (OA) [Tait & Knight], 930

Infiltration anesthesia, *See under Anesthetic techniques*

Infiltration techniques, *See under Anesthetic techniques*

Informed consent, *See under Medicolegal*

Infusion anesthesia, *See under Anesthetic techniques*

Infusions of anesthesia, *See under Anesthetics, intravenous*

Inguinal anesthesia, *See under Anesthetic techniques*

Inhalation anesthesia, *See under Anesthetic techniques*

Inotropism, *See under Heart*

Insulin, *See under Hormones*

#### Intensive care

##### critical care

two-hour *versus* 22-hour creatinine clearance in critically ill patients (CR) [Sladen, Endo & Harrison], 1013

#### Interactions (drug)

##### atracurium

neuromuscular block following, effect of phenytoin on magnitude and duration of (OA) [Ornstein, Matteo, Schwartz, Silverberg, Young & Diaz], 191

##### barbiturates

and benzodiazepine receptors affinity to midazolam (OA) [Kissin, Mason & Bradley], 26

##### benzodiazepines

binding, midazolam-barbiturate interaction and (OA) [Kissin, Mason & Bradley], 26

inhalational anesthetics and verapamil (OA) [Chelly, Hysing, Hill, Abernethy, Diewati, Doursout & Merin], 320

morphine and fentanyl hypnotic interactions with thiopental (OA) [Kissin, Mason & Bradley], 331

##### phenytoin

effect of, on magnitude and duration of neuromuscular block following atracurium or vecuronium (OA) [Ornstein, Matteo, Schwartz, Silverberg, Young & Diaz], 191

##### quinidine

effect of, on plasma cholinesterase activity and succinylcholine neuromuscular blockade (CR) [Kambam, Franks, Naukam & Sastry], 858

##### succinylcholine

effect of quinidine on plasma cholinesterase activity and (CR) [Kambam, Franks, Naukam & Sastry], 858

##### vecuronium

neuromuscular block following, effect of phenytoin on magnitude and duration of (OA) [Ornstein, Matteo, Schwartz, Silverberg, Young & Diaz], 191

Intracranial pressure, *See under Brain*

Intraocular pressure, *See under Eye(s)*

Intrapleural anesthesia, *See under Anesthetic techniques*

Intravascular injection, *See under Complications*

Intravenous anesthetics, *See under Anesthetics*

Introducer sheath, *See under Equipment*

#### Intubation

##### awake tracheal

unexpected migration of esophageal foreign body (CR) [Greschner & Devitt], 565

##### endobronchial

a preventable complication (CR) [Owen & Cheney], 255

##### endotracheal

accidental migration of tube tip into bronchus in (CR) [Owen & Cheney], 255

##### complications

sore throat and hoarseness, correlation of endotracheal tube size with, following general anesthesia (CR) [Stout, Bishop, Dwersteg & Cullen], 419

EEG spectral edge frequency changes and hemodynamic response to (CR) [Rampil & Matteo], 139

##### fiberoptic

percutaneous transtracheal high-frequency jet ventilation as aid to (CR) [Boucek, Gunnerson & Tullock], 247

##### techniques

selective blind endobronchial, in children and adults (CR) [Kubota, Kubota, Toyoda, Ishida, Asada & Matsuura], 587

- tracheal  
difficult, airway management in (CO) [Coveler], 154  
rapid sequence, correct position of head and neck for (CO) [Tran], 861
- Ionized calcium, See under Ions**
- Ions**
- calcium**  
and cardiovascular effects of nifedipine or verapamil (OA) [Schulte-Sasse & Tarnow], 492
- citrate**  
toxicity in dogs, halothane potentiates (OA) [Coté], 676
- efflux**  
halothane inhibits, following myocardial ischemia in guinea pig hearts (OA) [Hoka, Bosnjak & Kampine], 197  
and hypocalcemia and prolonged QT interval following carotid artery surgery (CR) [Zane, Eisenkraft & Haimov], 998
- ionized**  
in anesthetic depression of myocardial contractility (RA) [Rusy & Komai], 745
- paradox**  
halothane inhibits, following myocardial ischemia in guinea pig hearts (OA) [Hoka, Bosnjak & Kampine], 197
- transport**  
effect of pH on, in presence of volatile anesthetics (LR) [Casella, Suite, Fisher & Blanck], 386
- uptake**  
effect of pH on, in presence of volatile anesthetics (LR) [Casella, Suite, Fisher & Blanck], 386  
halothane inhibits, following myocardial ischemia in guinea pig hearts (OA) [Hoka, Bosnjak & Kampine], 197
- cardiovascular effects**  
depth of halothane anesthesia potentiates (OA) [Coté], 676
- magnesium**  
interaction with succinylcholine-vecuronium sequence in eclampsia (CR) [Baraka & Yazigi], 806
- potassium**
- hyperkalemia**  
succinylcholine-induced, in near-drowning (CO) [Tong], 605  
succinylcholine-induced, in near-drowning (CO) [Zauder], 604  
and hyperkalemia after succinylcholine administration in closed head injury (CR) [Frankville & Drummond], 264  
low concentrations of, and intraoperative cardiac dysrhythmias in bulimic anorexia nervosa (CR) [Arnold, Rose & Stoddard], 1003
- Ischemia, See under Brain; Heart**
- Isoflurane, See under Anesthetics, volatile**
- Isoproterenol, See under Sympathetic nervous system, beta adrenergic receptors**
- Isotopes**
- <sup>31</sup>phosphorus**  
NMR spectroscopy, in assessment of mechanism of negative inotropic action of halothane (OA) [Murray, Blanck, Rogers & Jacobus], 649

## K

- Katz, J., and Steward, D. J. (eds.)  
*Anesthesia and Uncommon Pediatric Disease* (BR), 616
- Ketamine, See under Anesthetics, intravenous**
- Ketanserin, See under Antagonists, serotonergic**
- Keyed filling devices, See under Equipment**
- Kidney**
- creatinine clearance**  
two-hour versus 22-hour, in critically ill patients (CR) [Sladen, Endo & Harrison], 1013

- transplantation**  
malignant hyperthermia in (CR) [Byers & Merin], 979
- Kinetics, See under Pharmacokinetics**

## L

- Labetalol, See under Pharmacology; Sympathetic nervous system, sympatholytic agents**
- Lactate, See under Acid-base equilibrium; Brain; Metabolism**
- Laryngoscope, See under Equipment**
- Laryngoscopy, See under Larynx**
- Laryngospasm, See under Complications**
- Larynx**  
laryngoscopy  
direct, to relieve airway obstruction in mediastinal mass (CR) [de Soto], 116
- Laser**  
fire  
of endotracheal tubes (LR) [Wolf & Simpson], 236
- Left atrial pressure, See under Blood pressure**
- Levy, J.M.**  
*Anaphylactic Reactions in Anaesthesia and Intensive Care* (BR), 450
- Lidocaine, See under Anesthetics, local; Pharmacokinetics**
- Ligand, See under Sympathetic nervous system**
- Light in operating room, See under Operating rooms**
- Ligneous tracheobronchitis, See under Airway**
- Lithotripsy**  
extracorporeal shock wave, *See under Kidney; Surgery*
- Liver**  
blood flow  
during halothane or isoflurane in guinea pigs (OA) [Hursh, Gelman & Bradley], 701
- hepatotoxicity**  
in repeated halothane anesthetics in hypoxic rat model (OA) [Plummer, Hall, Jenner & Cousins], 355
- oxygen supply**  
during halothane or isoflurane in guinea pigs (OA) [Hursh, Gelman & Bradley], 701
- toxicity**  
and death following isoflurane anesthesia (CR) [Carrigan & Straughen], 581  
*See also under Toxicity*
- Liver transplantation, See under Surgery**
- Low-back pain, See under Pain**
- Low-flow anesthesia, See under Anesthetics**
- Lumbar epidural anesthesia, See under Anesthetic techniques, regional**
- Lung blood flow, See under Measurement techniques**
- Lung(s)**  
atelectasis  
in use of halothane and isoflurane during one-lung ventilation for thoracotomy (OA) [Benumof, Augustine & Gibbons], 910
- blood flow**  
in anesthetized dogs, comparative study between electromagnetometry and SF<sub>6</sub> and CO<sub>2</sub> elimination (LR) [Carlsson, Hedenstierna, Blomqvist & Strandberg], 240  
in high-dose almitrine inhibition of hypoxic pulmonary vasoconstriction (OA) [Chen, Miller, Malmkvist, Clergue, Marshall & Marshall], 534  
low, serotonin metabolism at (OA) [Watkins & Rannels], 916
- pulmonary capillary pressure**  
simple method to determine (CO) [Cope, Allison & Taylor], 866

in use of halothane and isoflurane during one-lung ventilation for thoracotomy (OA) [Benumof, Augustine & Gibbons], 910

**bronchopleural fistula**

craniotomy for tumor in (CR) [Gutstein & Koblin], 804

**compliance**

and systolic pressure variation indicating hypovolemia in graded hemorrhage (OA) [Perel, Pizov & Cotev], 498

**drug uptake**

first pass, of fentanyl, meperidine, and morphine (OA) [Roerig, Kotrly, Vucins, Ahlf, Dawson & Kampine], 466

**edema**

intraoperative re-expansion (CR) [Discederio, Meister & Bedford], 821

**functional residual capacity**

measurement, by sulfur hexafluoride washout (LR) [Larsson, Linnarsson, Jonmarker, Jonson, Larsson & Werner], 543

and reduction of tonic ribcage muscle activity by anesthesia with thiopental (OA) [Drummond], 695

and high-frequency jet ventilation during thoracic surgical procedures (CR) [Howland, Carlson, Goldiner, Rooney, Conception, Bains & McCormack], 1009

**hypoxic pulmonary vasoconstriction**

in anesthetized dogs, comparative study between electromagnetometry and SF<sub>6</sub> and CO<sub>2</sub> elimination (LR) [Carlsson, Hedenstierna, Blomqvist & Strandberg], 240

high-dose almitrine bismesylate inhibits, in closed-chest dogs (OA) [Chen, Miller, Malmkvist, Clergue, Marshall & Marshall], 534

**metabolism**

of serotonin at low pulmonary flow (OA) [Watkins & Rannels], 916

**non-cardiogenic pulmonary edema**

effect of nitroprusside on, in hydrochloric acid aspiration (OA) [Gottlieb, Wood, Hansen & Long], 203

**obstructive pulmonary disease**

and sequential one-lung ventilation for bilateral bullectomy (CR) [Benumof], 268

**oxygen**

in use of halothane and isoflurane during one-lung ventilation for thoracotomy (OA) [Benumof, Augustine & Gibbons], 910

**respiratory distress syndrome**

effect of nitroprusside on, in hydrochloric acid aspiration (OA) [Gottlieb, Wood, Hansen & Long], 203

**serotonin**

metabolism at low pulmonary flow (OA) [Watkins & Rannels], 916

**shunt**

effect of nitroprusside on, in hydrochloric acid aspiration (OA) [Gottlieb, Wood, Hansen & Long], 203

**shunting**

in high-dose almitrine inhibition of hypoxic pulmonary vasoconstriction (OA) [Chen, Miller, Malmkvist, Clergue, Marshall & Marshall], 534

in use of halothane and isoflurane during one-lung ventilation for thoracotomy (OA) [Benumof, Augustine & Gibbons], 910

**vascular conductance**

in high-dose almitrine inhibition of hypoxic pulmonary vasoconstriction (OA) [Chen, Miller, Malmkvist, Clergue, Marshall & Marshall], 534

**washout**

sulfur hexafluoride, measurement to lung volume by (LR) [Larsson, Linnarsson, Jonmarker, Jonson, Larsson & Werner], 543

Lunn, J.N. (ed.)  
*Epidemiology in Anesthesia: The Techniques of Epidemiology Applied to Anesthetic Practice* (BR), 450

**Lymphocyte function**, *See under Immune response*

## M

**MAC**, *See under Anesthesia, requirements; Potency, anesthetic*

**Magnesium**, *See under Ions*

**Magnetic resonance spectroscopy**, *See under Measurement techniques*

**Malignant hyperthermia**, *See under Hyperthermia*

**Manpower**

no evidence that anesthesiologists enhance care of parturient (CO) [Levinson, Shnider & Gibbs], 152

no evidence that anesthesiologists enhance care of parturient (CO) [Singer], 152

**Mask(s)**, *See under Equipment*

**Mass spectrometer**, *See under Equipment*

**Mass spectrometry**, *See under Monitoring*

**Masseter muscle**, *See under Muscle*

**Masseter spasm**, *See under Complications*

**Masticatory muscles**, *See under Muscle*

**Maternal hemodynamics**, *See under Hemodynamics*

**Mean arterial blood pressure**, *See under Hemodynamics*

**Measurement techniques**

**algorithms**

for accurate, automated, continuously displayed pulmonary artery pressure measurement (OA) [Mitchell, Meathe, Jones, Donch, Ricks, Benumof & Saidman], 294

**cardiac output**

invasive *versus* 2D-echocardiography for (OA) [Thys, Hillel, Goldman, Mindich & Kaplan], 630

**computed tomography**

cervical, use of endotracheal tube without radiopaque marker for (CO) [Tashiro & Yagi], 1022

**computerized monitoring**

for accurate, automated, continuously displayed pulmonary artery pressure measurement (OA) [Mitchell, Meathe, Jones, Donch, Ricks, Benumof & Saidman], 294

in measurement of central vascular pressures (EV) [Teplick], 289

**Doppler echocardiography**

in study of effect of halothane and isoflurane on cardiac function in infants and small children (OA) [Murray, Vandewalker, Matherne & Mahoney], 211

**echocardiography**

in study of transpulmonary passage of venous air emboli (OA) [Yahagi & Furuya], 905

**electromyography**

and ketanserin pretreatment reverses alfentanil-induced muscle rigidity (OA) [Weinger, Cline, Smith & Koob], 348

**flow proportional admixture**

and measurement of lung volume by sulfur hexafluoride washout (LR) [Larsson, Linnarsson, Jonmarker, Jonson, Larsson & Werner], 543

**gas chromatography**

in study of assay methods for fentanyl in serum (LR) [Woestenborghs, Stanski, Scott & Heykants], 85

**inert gas**

in anesthetized dogs, comparative study between electromagnetometry and SF<sub>6</sub> and CO<sub>2</sub> elimination (LR) [Carlsson, Hedenstierna, Blomqvist & Strandberg], 240

**lung blood flow**

in anesthetized dogs, comparative study between electromagne-

- ometry and SF<sub>6</sub> and CO<sub>2</sub> elimination (LR) [Carlsson, Hedenstierna, Blomqvist & Strandberg], 240
- magnetic resonance spectroscopy**  
new techniques, new opportunities, old problems (EV) [Smith & Chance], 157
- neuromuscular blockade**  
in study of succinylcholine and atracurium on diaphragm and adductor pollicis muscle in humans (OA) [Pansard, Chauvin, Lebrault, Gauneau & Duvaldestin], 326
- NMR spectroscopy**  
<sup>31</sup>phosphorus, in assessment of mechanism of negative inotropic action of halothane (OA) [Murray, Blanck, Rogers & Jacobus], 649
- nuclear magnetic resonance spectroscopy**  
of halothane uptake and elimination in rat brain (OA) [Litt, González-Méndez, James, Sessler, Mills, Chew, Moseley, Pereira, Severinghaus & Hamilton], 161  
*in vivo* <sup>19</sup>F, in study of isoflurane elimination from rabbit brain (OA) [Mills, Sessler, Moseley, Chew, Pereira, James & Litt], 169
- Pitot tube**  
modified, for measurement of tidal volume in children (LR) [Wolf & Volgyesi], 775
- pulmonary artery pressure**  
for accurate, automated, continuously displayed pulmonary artery pressure measurement (OA) [Mitchell, Meathe, Jones, Donch, Ricks, Benumof & Saidman], 294
- pulmonary capillary pressure**  
simple method to determine (CO) [Cope, Allison & Taylor], 866
- pulse oximetry**  
signal detection, blood flow limits and (CR) [Lawson, Norley, Korbon, Loeb & Ellis], 599
- radioimmunoassay**  
in study of assay methods for fentanyl in serum (LR) [Woestenborghs, Stanski, Scott & Heykants], 85
- sulfur hexafluoride**  
washout, measurement of lung volume by (LR) [Larsson, Linarsson, Jonmarker, Jonson, Larsson & Werner], 543
- transdiaphragmatic pressure**  
in study of succinylcholine and atracurium on diaphragm and adductor pollicis muscle in humans (OA) [Pansard, Chauvin, Lebrault, Gauneau & Duvaldestin], 326
- two-dimensional echocardiography**  
in study of effect of halothane and isoflurane on cardiac function in infants and small children (OA) [Murray, Vandewalker, Matherne & Mahoney], 211
- ventilation and perfusion lung scintigraphy**  
to predict oxygenation during ong-lung anesthesia (CR) [Hurford, Kolker & Strauss], 841
- Mechanical ventilation, See under Ventilation**
- Mediastinal mass**  
direct laryngoscopy to relieve airway obstruction in (CR) [de Soto], 116
- Medicolegal**  
**informed consent**  
clinical research and (CO) [Harte], 143  
clinical research and (CO) [Tarnow], 144
- Memory**  
**amnesia**  
following midazolam in obstetric anesthesia (CO) [Seidman & Marx], 443
- Meperidine, See under Analgesics; Anesthetics, intravenous**
- Mepivacaine, See under Anesthetics, local**
- Metabolic rate of oxygen, See under Oxygen**
- Metabolism**  
**adenosine diphosphate**  
and halogenated anesthetics influence on isolated hepatocytes from phenobarbital-treated rats (OA) [Becker, Miletich & Albrecht], 185
- adenosine triphosphate**  
and halogenated anesthetics influence on isolated hepatocytes from phenobarbital-treated rats (OA) [Becker, Miletich & Albrecht], 185
- anorexia nervosa**  
intraoperative cardiac dysrhythmias in (CR) [Arnold, Rose & Stoddard], 1003
- bulimia**  
intraoperative cardiac dysrhythmias in (CR) [Arnold, Rose & Stoddard], 1003
- diazoxide**  
in severe hyperinsulinism, in infant receiving anesthesia for pancreatotomy (CR) [Yamashita & Tsuneto], 985
- enzyme induction**  
and halogenated anesthetics influence on isolated hepatocytes from phenobarbital-treated rats (OA) [Becker, Miletich & Albrecht], 185
- free fatty acids**  
in malignant hyperthermia susceptible subjects, effects of graded exercise on leg exchange of (OA) [Rutberg, Hakanson, Hall & Jorfeldt], 308
- glucose**  
in malignant hyperthermia susceptible subjects, effects of graded exercise on leg exchange of (OA) [Rutberg, Hakanson, Hall & Jorfeldt], 308  
and reevaluation of intraoperative use of (MI) [Sieber, Smith, Traystman & Wollman], 72
- glycogen**  
in malignant hyperthermia susceptible subjects, effects of graded exercise on leg exchange of (OA) [Rutberg, Hakanson, Hall & Jorfeldt], 308
- hyperglycemia**  
and reevaluation of intraoperative glucose use (MI) [Sieber, Smith, Traystman & Wollman], 72
- hyperinsulinemia**  
and reevaluation of intraoperative glucose use (MI) [Sieber, Smith, Traystman & Wollman], 72
- hyperinsulinism**  
treated by pancreatotomy, anesthesia for infant with (CR) [Yamashita & Tsuneto], 985
- hypoglycemia**  
and reevaluation of intraoperative glucose use (MI) [Sieber, Smith, Traystman & Wollman], 72  
treated by pancreatotomy, anesthesia for infant with (CR) [Yamashita & Tsuneto], 985
- hypoxia**  
and halogenated anesthetics influence on isolated hepatocytes from phenobarbital-treated rats (OA) [Becker, Miletich & Albrecht], 185
- lactate**  
in malignant hyperthermia susceptible subjects, effects of graded exercise on leg exchange of (OA) [Rutberg, Hakanson, Hall & Jorfeldt], 308  
and reevaluation of intraoperative glucose use (MI) [Sieber, Smith, Traystman & Wollman], 72
- lactate formation**  
and halogenated anesthetics influence on isolated hepatocytes from phenobarbital-treated rats (OA) [Becker, Miletich & Albrecht], 185

- oxidative**  
of halothane, in cirrhotic rats (OA) [Baden, Serra, Fujinaga & Mazze], 660
- oxidative phosphorylation**  
in lidocaine dosage in dogs anesthetized with isoflurane (OA) [Milde & Milde], 180
- oxygen consumption**  
effect of halothane on, in anesthetized newborn lamb (OA) [Hershenson, O'Rourke, Schena & Crone], 174  
and halogenated anesthetics influence on isolated hepatocytes from phenobarbital-treated rats (OA) [Becker, Miletich & Albrecht], 185  
in malignant hyperthermia susceptible subjects, effects of graded exercise on leg exchange of (OA) [Rutberg, Hakanson, Hall & Jorfeldt], 308
- reductive**  
of halothane, in cirrhotic rats (OA) [Baden, Serra, Fujinaga & Mazze], 660
- Metabolism, See under Brain**
- Methohexital, See under Anesthetics, intravenous**
- Methylmethacrylate, See under Surgery**
- Methylprednisolone, See under Hormones**
- Metoclopramide, See under Pharmacology**
- Metocurine, See under Neuromuscular relaxants**
- Methohexital, See under Anesthetics, intravenous**
- Midazolam, See under Anesthetics, intravenous; Pharmacodynamics; Pharmacokinetics; Sedation; Hypnotics; Premedication**
- Monitoring**  
**blood pressure**  
with Dinamap<sup>TM</sup>, caution when using different cuffs with (CO) [Peterson], 607  
**central venous pressure**  
during cesarean section (CO) [Robinson, Bunegin & Albin], 147  
during cesarean section (CO) [Rupp], 146  
**computerized EEG**  
is it a useful monitor during cardiac surgery? (CR) [El-Fiki & Fish], 575  
**echocardiography**  
two-dimensional *versus* invasive, for hemodynamic indices (OA) [Thys, Hillel, Goldman, Mindich & Kaplan], 630  
**electrocardiography**  
in addition of nitrous oxide to fentanyl in patients with ischemic heart disease (OA) [Cahalan, Prakash, Rulf, Cahalan, Mayala, Lurz, Rosseel, Lachitjaran, Siphanto, Gussenhoven & Roelandt], 925  
**fetal**  
modification of, as hazardous (CO) [Sand], 448  
**QT interval**  
prolongation of, in association with large doses of opiates (CO) [Blair, Pruett, Crumrine & Balser], 442  
**electroencephalography**  
during cardiopulmonary bypass (OA) [Woodcock, Murkin, Farrar, Tweed, Guiraudon & McKenzie], 218  
changes in response to laryngoscopy and intubation (CR) [Rampil & Matteo], 139  
is it a useful monitor during cardiac surgery? (CR) [El-Fiki & Fish], 575  
quantitative analysis, closed-loop feedback control of methohexital anesthesia (OA) [Schwilden, Schüttler & Stoeckel], 341  
seizure activity, myoclonus following sufentanil without (CR) [Bowdle], 593  
**end-tidal concentration**  
and minimum alveolar concentration of isoflurane in preterm neonates (OA) [Le Dez & Lerman], 301
- evoked potentials**  
**visual**  
effects of fentanyl anesthesia on (CR) [Chi, McCoy & Field], 827
- mass spectrometry**  
one-way leak in sampling system in (CO) [Koeberl & Munster], 606
- nerve**  
in assessment of level of spinal anesthesia (CR) [Meyer & McCune], 125
- oximetry**  
preventing ambient light from affecting (CO) [Siegel & Gravenstein], 280  
reusing Nellcor pulse probe in (CO) [Kao & Badgwell], 866  
during shoulder arthroscopy (CO) [Gibbs, Handal & Nentwig], 150
- oxygen**  
dyes and pulse oximeter (CO) [Eide, Humayun-Scott & Poppers], 149  
dyes and pulse oximeter (CO) [Unger & Scheller], 148
- pulmonary artery**  
influence of balloon inflation and deflation on location of pulmonary artery catheter tip (CR) [Johnston, Royster, Vinten-Johansen, Gravlee, Howard, Mills & Tucker], 110
- pulmonary artery pressure**  
for accurate, automated, continuously displayed pulmonary artery pressure measurement (OA) [Mitchell, Meathe, Jones, Donch, Ricks, Benumof & Saidman], 294
- pulse oximetry**  
accuracy of response of, to profound hypoxia (LR) [Severinghaus & Naifeh], 551
- artifact**  
ambient light affects (CO) [Hanowell, Eisele & Downs], 864  
ambient light affects (CO) [Swedlow, Running & Feaster], 865  
effects of, on incidence of anesthesia complications (OA) [Cooper, Cullen, Nemeskai, Hoaglin, Gevirtz, Csete & Venable], 686  
falsely normal saturation reading with (CR) [Costarino, Davis & Keon], 830  
in infants, burn, erosion, and "sun" tan with use of (CR) [Miyasaka & Ohata], 1008
- pulsed Doppler**  
ascending aortic, carotid, branchial and femoral artery blood flows during caudal anesthesia in infants (OA) [Payen, Ecofey, Carli & Dubouset], 681
- spectral edge frequency**  
changes in response to laryngoscopy and intubation (CR) [Rampil & Matteo], 139
- stimulator**  
in assessment of level of spinal anesthesia (CR) [Meyer & McCune], 125
- temperature**  
during extracorporeal shock wave lithotripsy (CO) [Malhotra], 448
- transesophageal echocardiography**  
in addition of nitrous oxide to fentanyl in patients with ischemic heart disease (OA) [Cahalan, Prakash, Rulf, Cahalan, Mayala, Lurz, Rosseel, Lachitjaran, Siphanto, Gussenhoven & Roelandt], 925
- Monitoring lumens, See under Equipment**
- Monitor(s), See under Equipment**
- Morphine, See under Analgesics**
- Motor nerve endings, See under Neuromuscular junction**
- Muscle**  
activity, tonic ribcage, reduction of, by anesthesia with thiopental (OA) [Drummond], 695

- adductor pollicis**
  - effect of intubating dose of succinylcholine and atracurium on (OA) [Pansard, Chauvin, Lebrault, Gauneau & Duvaldestin], 326
- cardiac**
  - in anesthetic depression of myocardial contractility (RA) [Rusy & Komai], 745
  - effect of volatile anesthetics on pH dependence of calcium uptake by (LR) [Casella, Suite, Fisher & Blanck], 386
- diaphragm**
  - effect of intubating dose of succinylcholine and atracurium on (OA) [Pansard, Chauvin, Lebrault, Gauneau & Duvaldestin], 326
- hyperactivity**
  - after general anesthesia, intraocular pressure changes during (CO) [Grover, Mahajan & Sharma], 604
  - after general anesthesia, intraocular pressure changes during (CO) [Williams], 604
- masseter**
  - rigidity, following succinylcholine (EV) [Rosenberg], 453
  - spasm, increased incidence of, in children with strabismus anesthetized with halothane and succinylcholine (CR) [Carroll], 559
- masticatory**
  - effects of succinylcholine on (OA) [Van Der Spek, Fang, Ashton-Miller, Stohler, Carlson & Schork], 459
- rigidity**
  - ketanserin pretreatment reverses alfentanil-induced (OA) [Weinger, Cline, Smith & Koob], 348
- sarcolemma**
  - anesthetic depression of (RA) [Rusy & Komai], 745
- sarcoplasmic reticulum**
  - anesthetic depression of (RA) [Rusy & Komai], 745
  - effect of volatile anesthetics on pH dependence of calcium uptake by (LR) [Casella, Suite, Fisher & Blanck], 386
- skeletal**
  - fasciculation(s)**
    - and "defasciculation" with metocurine in prevention of increased intracranial pressure (OA) [Stirt, Grosslight, Bedford & Vollmer], 50
    - neostigmine-induced, suppression of, by vecuronium and isoflurane (OA) [Baker & Stanec], 942
  - myoglobin**
    - in acute rhabdomyolysis following halothane anesthesia with succinylcholine (CR) [Rubiano, Chang, Carroll, Sonbolian & Larson], 856
- Mutagenicity, See under Toxicity**
- Myocardial blood flow, See under Heart**
- Myocardial contractility, See under Heart**
- Myocardial dysfunction, See under Complications**
- Myocardial function, See under Heart**
- Myocardial ischemia, See under Heart**
- Myoclonus, See under Complications**
- Myofibrils, See under Heart**
- Myoglobin, See under Muscle, skeletal**

N

- Narcotic anesthesia, See under Anesthetics, intravenous**
- Narcotics, See under Analgesics**
- Natural killer cell activity, See under Immune response**
- Natural spike activity, See under Nerve(s)**
- Nausea, See under Vomiting**
- Near-drowning, See under Complications**
- Needle(s), See under Equipment**

- Negative inotropism, See under Heart**
- Neonates, See under Anesthesia, pediatric**
- Neostigmine, See under Antagonists, neuromuscular relaxants**
- Nerve(s)**
  - axon**
    - mammalian, use-dependent block in (OA) [Fink & Cairns], 477
  - block, See under Anesthetic techniques, regional**
  - conduction block**
    - duration of action of triethylldodecyl ammonium bromide on (OA) [Lipfert, Seitz & Arndt], 896
  - differential nerve block**
    - in single mammalian axons (OA) [Fink & Cairns], 477
  - electrophysiology**
    - and differential use-dependent effects in single mammalian axons (OA) [Fink & Cairns], 477
  - frequency-dependent block**
    - in mammalian axons (OA) [Fink & Cairns], 477
  - monitoring, See under Monitoring**
  - natural spike activity**
    - duration of action of triethylldodecyl ammonium bromide on (OA) [Lipfert, Seitz & Arndt], 896
  - use-dependent block**
    - in mammalian axons (OA) [Fink & Cairns], 477
- Neuroleptic malignant syndrome, See under Hyperthermia, malignant**
- Neurologic deficit, See under Complications**
- Neurologic surgery, See under Surgery**
- Neuromuscular antagonists, See under Antagonists**
- Neuromuscular blockade, See under Measurement techniques**
- Neuromuscular disease, See under Complications**
- Neuromuscular junction**
  - effect of intubating dose of succinylcholine and atracurium on (OA) [Pansard, Chauvin, Lebrault, Gauneau & Duvaldestin], 326
- motor nerve endings**
  - mammalian, drug actions at (OA) [Baker & Stanec], 924
- Neuromuscular relaxants**
  - atracurium**
    - effect of intubating dose of, on diaphragm and adductor pollicis muscle in humans (OA) [Pansard, Chauvin, Lebrault, Gauneau & Duvaldestin], 326
    - heart rate and rhythm following edrophonium/atropine mixture for antagonism of (CR) [Urquhart, Ramsey, Royster, Morell & Gerr], 561
  - isomers**
    - pharmacokinetics of, *in vitro* and in humans (OA) [Tsui, Graham & Torda], 722
  - neuromuscular block following, effect of phenytoin on magnitude and duration of (OA) [Ornstein, Matteo, Schwartz, Silverberg, Young & Diaz], 191**
  - sensitivity of adductor pollicis and diaphragm muscles to, in hemiplegic patient (CR) [Laycock, Smith, Donati & Bevan], 851**
- desensitization block**
  - in succinylcholine administration in guinidine therapy (CR) [Kambam, Franks, Naukam & Sastry], 858
- dual block**
  - in succinylcholine administration in guinidine therapy (CR) [Kambam, Franks, Naukam & Sastry], 858
- metocurine**
  - "defasciculation" with, in prevention of intracranial pressure (OA) [Stirt, Grosslight, Bedford & Vollmer], 50

**pancuronium**

- effects of, on mouth opening (OA) [Van Der Spek, Fang, Ashton-Miller, Stohler, Carlson & Schork], 459
- in isoflurane anesthesia in dogs, hemodynamic effects of UL-FS 49 and propranolol in (OA) [Riley, Gross, Kampine & Warltier], 707
- kinetics and dynamics in elderly (OA) [Rupp, Castagnoli, Fisher & Miller], 45

**phase II block**

- in succinylcholine administration in guinidine therapy (CR) [Kambam, Franks, Naukam & Sastry], 858

**prejunctional site of action**

- at mammalian motor nerve endings (OA) [Baker & Stanec], 942

**succinylcholine**

- and atypical serum cholinesterase eliminated by orthotopic liver transplantation (CR) [Khoury, Brill, Walts & Busuttill], 273
  - effect of intubating dose of, on diaphragm and adductor pollicis muscle in humans (OA) [Pansard, Chauvin, Lebrault, Gaumeau & Duvaldestin], 326
  - effect of quinidine on plasma cholinesterase activity and (CR) [Kambam, Franks, Naukam & Sastry], 858
  - effects of, on mouth opening (OA) [Van Der Spek, Fang, Ashton-Miller, Stohler, Carlson & Schork], 459
  - hyperkalemia after, in closed head injury without paresis (CR) [Frankville & Drummond], 264
  - hyperkalemia induced by, in near-drowning (CO) [Tong], 605
  - hyperkalemia induced by, in near-drowning (CO) [Zauder], 604
  - intracranial pressure induced by, metocurine in prevention of (OA) [Stirt, Grosslight, Bedford & Vollmer], 50
  - magnesium interaction with, in eclampsia (CR) [Baraka & Yazigi], 806
  - masseter spasm in children with strabismus anesthetized with (CR) [Carroll], 559
  - second dose of, effect on cardiac rate and rhythm following etomidate or midazolam induction (CR) [Abdul-Rasool, Sears & Katz], 795
  - trismus following (EV) [Rosenberg], 453
- vecuronium**
- continuous infusion of: effect of anesthetic agents (OA) [Cannon, Fahey, Castagnoli, Furuta, Canfell, Sharma & Miller], 503
  - effect of, on intracranial pressure and hemodynamics (CR) [Stirt, Maggio, Haworth, Minton & Bedford], 570
  - effects of, on mouth opening (OA) [Van Der Spek, Fang, Ashton-Miller, Stohler, Carlson & Schork], 459
  - heart rate and rhythm following edrophonium/atropine mixture for antagonism of (CR) [Urquhart, Ramsey, Royster, Morell & Gerr], 561
  - kinetics and dynamics in elderly (OA) [Rupp, Castagnoli, Fisher & Miller], 45
  - magnesium interaction with, in eclampsia (CR) [Baraka & Yazigi], 806
  - neuromuscular block following, effect of phenytoin on magnitude and duration of (OA) [Ornstein, Matteo, Schwartz, Silverberg, Young & Diaz], 191
  - priming, histaminoid reaction from (CR) [Durrani & O'Hara], 130
  - and prolonged neuromuscular blockade in postpartum patients (CR) [Camp, Tessem, Adenwala & Joyce], 1006
  - in suppression of neostigmine-induced fasciculations (OA) [Baker & Stanec], 942

**Neurosurgical anesthesia, See under Anesthesia**

**Neurotoxicity, See under Toxicity**

**Nifedipine, See under Anesthetic techniques, hypotension, induced**

**Nimodipine, See under Calcium entry blockers**

**Nitroprusside, See under Anesthetic techniques, hypotension, induced; Pharmacology**

**Nitrous oxide, See under Anesthetics, gases**

**NMR spectroscopy, See under Measurement techniques**

**Non-cardiogenic pulmonary edema, See under Lung(s)**

**Norepinephrine, See under Sympathetic nervous system, catecholamines**

**Nuclear magnetic resonance spectroscopy, See under Measurement techniques**

**Nuwer, M. R. (ed.)**

*Evoked Potential Monitoring in the Operating Room* (BR), 873

**O**

**Obstetric analgesia, See under Analgesia**

**Obstetric anesthesia, See under Anesthesia**

**Obstructive pulmonary disease, See under Lung(s)**

**One-lung ventilation, See under Anesthetic techniques; Ventilation**

**Operating rooms**

**light**

affects pulse oximeters (CO) [Hanowell, Eisele & Downs], 864

affects pulse oximeters (CO) [Swedlow, Running & Feaster], 865

**Ophthalmology, See under Surgery**

**Opisthotonus, See under Brain**

**Organizations**

**American Society of Anesthesiologists**

ASA award: B. Raymond Fink (SA), 456

symposium on "Exploring Ethical Issues in Critical Care Medicine" (SM) [Groeger], 1029

**Orthopedic surgery, See under Surgery**

**Osmolality, See under Fluid balance**

**Outpatient anesthesia, See under Anesthesia**

**Oxidative metabolism, See under Metabolism**

**Oxidative phosphorylation, See under Metabolism**

**Oximeter, See under Equipment**

**Oximetry, See under Monitoring**

**Oxygen**

**blood levels**

in high-dose almitrine inhibition of hypoxic pulmonary vasoconstriction (OA) [Chen, Miller, Malmkvist, Clergue, Marshall & Marshall], 534

**delivery**

pulse oximeter signal detection, blood flow limits and (CR) [Lawson, Norley, Korbon, Loeb & Ellis], 599

enriched atmosphere, flammability of endotracheal tubes (LR) [Wolf & Simpson], 236

**hypoxia**

falsely normal saturation reading with pulse oximeter in (CR) [Costantino, Davis & Keon], 830

**monitoring, See under Monitoring**

**Oxygen consumption, See under Brain; Metabolism**

**Oxygen dissociation curve, See under Blood**

**Oxygen saturation, See under Blood**

**P**

**Pain**

**low-back**

epidural morphine and methylprednisolone for (CR) [Dallas, Lin, Wu & Wolskee], 408

**placebo**

normal saline as, and stellate ganglion block (CR) [Haddox & Kettler], 832

**postoperative**

caudal and ilioinguinal/iliohypogastric nerve blocks in children (CO) [Fell, Derrington & Wandless], 1020



- caudal and ilioinguinal/iliohypogastric nerve blocks in children (CO) [Hannallah, Broadman, Belman, Abramowitz & Epstein], 1021
- in children, continuous epidural infusion of bupivacaine for (CR) [Desparmet, Meistelman, Barre & Saint-Maurice], 108
- following circumcision, topical analgesia for relief of (CR) [Tree-trakarn, Pirayavaraporn & Lertakyamancee], 395
- following thoractomy, continuous epidural analgesia (CR) [Logas, El-Baz, El-Ganzouri, Cullen, Staren, Faber & Ivankovich], 787
- Pancreatectomy, See under Surgery**
- Pancuronium, See under Neuromuscular relaxants**
- Parasympathetic nervous system**
- atropine
- edrophonium mixture, for antagonism of neuromuscular blockade, heart rate and rhythm following (CR) [Urquhart, Ramsey, Royster, Morell & Gerr], 561
- Pediatric anesthesia, See under Anesthesia**
- Pediatric surgery, See under Surgery**
- Pediatrics**
- blood pressure
- with Dinamap™, caution when using different cuffs with (CO) [Peterson], 607
- premature
- do premature infants require anesthesia for surgery? (EV) [Berry & Gregory], 291
- PEEP, See under Ventilation**
- PEEP valve, See under Equipment**
- Pentobarbital, See under Anesthetics, intravenous**
- Peripheral blood flows, See under Heart**
- Petty, C. (ed.)
- The Anesthesia Machine* (BR), 872
- pH and H<sup>+</sup> distributions, See under Acid-base equilibrium**
- pH, See under Acid-base equilibrium; Airway**
- Pharmacodynamics**
- atracurium
- neuromuscular block following, effect of phenytoin on magnitude and duration of (OA) [Ornstein, Matteo, Schwartz, Silverberg, Young & Diaz], 191
- Cpss50
- pancuronium and vecuronium kinetics and dynamics and (OA) [Rupp, Castagnoli, Fisher & Miller], 45
- depth of anesthesia
- with methohexital (OA) [Schwilden, Schüttler & Stoeckel], 341
- midazolam
- following cardiac surgery (CR) [Westphal, Cheng, White, Sladen, Rosenthal & Sung], 257
- vecuronium
- neuromuscular block following, effect of phenytoin on magnitude and duration of (OA) [Ornstein, Matteo, Schwartz, Silverberg, Young & Diaz], 191
- Pharmacokinetics**
- adaptive feedback control
- of methohexital anesthesia by quantitative EEG analysis in humans (OA) [Schwilden, Schüttler & Stoeckel], 341
- alfentanil
- in children (OA) [Goresky, Koren, Sabourin, Sale & Strunin], 654
- arterial and venous blood sampling**
- and effects of halothane on propranolol concentrations in dog (OA) [Gordon, Wood, Koshakji, Wilkinson, Dupont & Wood], 225
- atracurium
- isomers, in vitro and in humans (OA) [Tsui, Graham & Torda], 722
- epidural meperidine
- in humans, comparative studies (EV) [Cousins], 875
- in humans, comparative study (OA) [Sjöström, Hartvig, Persson & Tamsen], 877
- epidural morphine**
- in humans, comparative studies (EV) [Cousins], 875
- in humans, comparative study (OA) [Sjöström, Hartvig, Persson & Tamsen], 877
- of fentanyl, meperidine, and morphine in human lung (OA) [Roerig, Kotrly, Vucins, Ahlf, Dawson & Kampine], 466
- of halothane uptake and elimination in rat brain (OA) [Litt, González-Méndez, James, Sessler, Mills, Chew, Moseley, Pereira, Severinghaus & Hamilton], 161
- intrapleural bupivacaine (CR) [Seltzer, Larijani, Goldberg & Marr], 798
- intrathecal meperidine**
- in humans, comparative studies (EV) [Cousins], 875
- in humans, comparative study (OA) [Sjöström, Tamsen, Persson & Hartvig], 889
- intrathecal morphine**
- in humans, comparative studies (EV) [Cousins], 875
- in humans, comparative study (OA) [Sjöström, Tamsen, Persson & Hartvig], 889
- of isoflurane elimination from rabbit brain, <sup>19</sup>F nuclear magnetic resonance study of (OA) [Mills, Sessler, Moseley, Chew, Pereira, James & Litt], 169
- kinetics**
- of pancuronium and vecuronium in elderly (OA) [Rupp, Castagnoli, Fisher & Miller], 45
- lidocaine**
- influence of right-to-left cardiac shunt on (OA) [Bokesch, Castaneda, Ziemer & Wilson], 739
- midazolam**
- following cardiac surgery (CR) [Westphal, Cheng, White, Sladen, Rosenthal & Sung], 257
- models**
- and closed-loop feedback control of methohexital anesthesia by quantitative EEG analysis (OA) [Schwilden, Schüttler & Stoeckel], 341
- of pancuronium and vecuronium in elderly (OA) [Rupp, Castagnoli, Fisher & Miller], 45
- opioids**
- spinal, in humans, comparative effects of (EV) [Cousins], 875
- propranolol**
- distribution in dog, halothane and (OA) [Gordon, Wood, Koshakji, Wilkinson, Dupont & Wood], 225
- theory**
- Plasma Drug Efflux (OA) [Crankshaw, Boyd & Bjorksten], 32
- vecuronium**
- continuous infusion of: effect of anesthetic agents (OA) [Cannon, Fahey, Castagnoli, Furuta, Canfell, Sharma & Miller], 503
- verapamil**
- and inhalational anesthetics (OA) [Chelly, Hysing, Hill, Abernethy, Diewati, Doursout & Merin], 320
- Pharmacology**
- almitrine bismesylate
- high-dose, inhibits hypoxic pulmonary vasoconstriction in closed-chest dogs (OA) [Chen, Miller, Malmkvist, Clergue, Marshall & Marshall], 534
- barbiturates**
- and benzodiazepine receptors affinity to midazolam (OA) [Kissin, Mason & Bradley], 26
- benzodiazepines**
- binding, midazolam-barbiturate interaction and (OA) [Kissin, Mason & Bradley], 26
- calcium channel blocking drugs**
- verapamil
- and inhalational anesthetics (OA) [Chelly, Hysing, Hill, Abernethy, Diewati, Doursout & Merin], 320

- calcium entry blocking drugs**  
and  $\alpha$ -receptor responsiveness (OA) [Massagee, McIntyre, Kates, Reves & Bai], 485
- clonidine**  
effect of, on perioperative hemodynamics and isoflurane requirements (OA) [Ghignone, Calvillo & Quintin], 3  
reduced narcotic requirement by, and hemodynamics in coronary bypass surgery (OA) [Flacke, Bloor, Flacke, Wong, Dazza, Stead & Laks], 11
- diltiazem**  
during enflurane anesthesia, impaired myocardial conduction in patients receiving (CR) [Hantler, Wilton, Learned, Hill & Knight], 94
- drug interactions**  
**atracurium**  
neuromuscular block following, effect of phenytoin on magnitude and duration of (OA) [Ornstein, Matteo, Schwartz, Silverberg, Young & Diaz], 191  
**phenytoin**  
effect of, on magnitude and duration of neuromuscular block following atracurium or vecuronium (OA) [Ornstein, Matteo, Schwartz, Silverberg, Young & Diaz], 191  
**vecuronium**  
neuromuscular block following, effect of phenytoin on magnitude and duration of (OA) [Ornstein, Matteo, Schwartz, Silverberg, Young & Diaz], 191
- ganglionic blocking drugs**  
**chlorisondamine**  
in study of inhalational anesthetics and verapamil (OA) [Chelly, Hysing, Hill, Abernethy, Diawati, Doursout & Merin], 320
- labetalol**  
intravenous, for treatment of postoperative hypertension (CR) [Leslie, Kalayjian, Sirgo, Plachetka & Watkins], 413
- metoclopramide**  
preoperative, unusual reaction to (CR) [Caldwell, Rains & McKitterick], 854
- nifedipine**  
cardiovascular effects of, prior to coronary artery bypass surgery (OA) [Schulte-Sasse & Tarnow], 492
- nitroprusside**  
effect of, on pulmonary edema, oxygen exchange, and blood flow in hydrochloric acid aspiration (OA) [Gottlieb, Wood, Hansen & Long], 203
- phenylephrine**  
and isoflurane and canine coronary artery rings (OA) [Blaise, Sill, Nugent, Van Dyke & Vanhoutte], 513
- prostaglandin F<sub>2a</sub>**  
and isoflurane and canine coronary artery rings (OA) [Blaise, Sill, Nugent, Van Dyke & Vanhoutte], 513
- serotonin**  
and isoflurane and canine coronary artery rings (OA) [Blaise, Sill, Nugent, Van Dyke & Vanhoutte], 513
- specific bradycardic agents**  
**UL-FS 49**  
new therapeutic modality for anesthesiology (OA) [Riley, Gross, Kampine & Warltier], 707
- vancomycin**  
histamine release by: mechanism for hypotension in man (CR) [Levy, Kettlekamp, Goertz, Hermens & Hirshman], 122
- vasoconstrictors**  
and isoflurane and canine coronary artery rings (OA) [Blaise, Sill, Nugent, Van Dyke & Vanhoutte], 513
- verapamil**  
cardiovascular effects of (OA) [Schulte-Sasse & Tarnow], 492
- Pharyngeal edema, See under Complications**
- Phase II block, See under Neuromuscular relaxants**
- Phenol, See under Preservatives**
- Phenothiazines, See under Ataractics**
- Phenylephrine, See under Pharmacology; Sympathetic nervous system, catecholamines**
- Phenytoin, See under Interactions (drug); Pharmacology, drug interactions**
- Pheochromocytoma, See under Surgery**
- Phosphates**  
high-energy, *See under Heart*
- <sup>31</sup>Phosphorus, See under Isotopes**
- Pitot tube, See under Measurement techniques**
- Placebo, See under Pain**
- Plasma cholinesterase, See under Enzymes**
- Plasma oncotic pressure, See under Blood; Blood pressure**
- Plasmapheresis, See under Blood**
- Pneumatic compression device, See under Equipment**
- Pollution, See under Complications**
- Position**  
of head and neck for rapid sequence induction (CO) [Tran], 861  
**Sellick's maneuver**  
for rapid sequence induction (CO) [Tran], 861
- Postherpetic neuralgia, See under Complications**
- Postoperative analgesia, See under Analgesia**
- Postoperative pain, See under Pain**
- Potassium, See under Ions**
- Potency**  
**anesthetic**  
**age factors**  
do premature infants require anesthesia for surgery? (EV) [Berry & Gregory], 291  
**clonidine**  
reduces halothane MAC in rats (CO) [Maze, Birch & Vickery], 868  
**ED<sub>50</sub>**  
and enflurane sparing effect of sufentanil in dogs (OA) [Hall, Murphy & Hug], 518  
in study morphine and fentanyl hypnotic interactions with thiopental (OA) [Kissin, Mason & Bradley], 331  
**enflurane**  
sparing effect of sufentanil in dogs (OA) [Hall, Murphy & Hug], 518  
**MAC**  
do premature infants require anesthesia for surgery? (EV) [Berry & Gregory], 291  
and enflurane sparing effect of sufentanil in dogs (OA) [Hall, Murphy & Hug], 518  
for halothane, in rats, clonidine reduces (CO) [Maze, Birch & Vickery], 868  
**sufentanil**  
enflurane sparing effect of, in dogs (OA) [Hall, Murphy & Hug], 518
- Precordial stethoscope, See under Equipment**
- Pregnancy**  
**teratogenicity**  
of nitrous oxide, isoflurane, and their combination, in Sprague-Dawley rats (OA) [Fujinaga, Baden, Yhap & Mazze], 960
- Prejunctional action sites, See under Neuromuscular relaxants**
- Premature infants, See under Pediatrics**
- Premedication**  
**antihistamine**  
for inhibition of stress-induced beta-endorphin secretion (CO) [Bach, Knigge & Warberg], 605  
**atropine**  
rapidly reduces lower esophageal sphincter pressure in infants and children (CR) [Opie, Chaye & Steward], 989

- clonidine  
  in alpine anesthesia (EV) [Longnecker], 1  
  effect of, on perioperative hemodynamics and isoflurane requirements (OA) [Ghignone, Calvillo & Quintin], 3
- midazolam  
  ventricular irritability induced by (CO) [Arcos], 612  
  to relieve anxiety, anxiety levels and prediction of (CR) [Lichter, Johanson, Mhoon, Faure, Hassan & Roizen], 595
- Preoperative care  
  and anxiety levels in prediction of anxiety (CR) [Lichter, Johanson, Mhoon, Faure, Hassan & Roizen], 595
- Preservatives  
  chlorobutanol  
    injury induced by, chronic epidural morphine and (CR) [DuPen, Ramsey & Chin], 987  
  formaldehyde  
    injury induced by, chronic epidural morphine and (CR) [DuPen, Ramsey & Chin], 987  
  phenol  
    injury induced by, chronic epidural morphine and (CR) [DuPen, Ramsey & Chin], 987
- Preterm infants, *See under* Age factors
- Procaine, *See under* Anesthetics, local
- Propofol, *See under* Anesthetics, intravenous
- Propranolol, *See under* Antagonists, beta adrenergic receptors; Pharmacokinetics; Sympathetic nervous system
- Prostaglandin F<sub>2A</sub>, *See under* Pharmacology
- Protamine, *See under* Blood, coagulation
- Psychologic responses  
  anxiety  
    preoperative, and prediction of anxiety levels (CR) [Lichter, Johanson, Mhoon, Faure, Hassan & Roizen], 595
- Pulmonary artery monitoring, *See under* Monitoring
- Pulmonary artery perforation, *See under* Complications
- Pulmonary artery pressure, *See under* Blood pressure; Measurement techniques; Monitoring
- Pulmonary blood flow, *See under* Lung(s)
- Pulmonary capillary pressure, *See under* Lung(s), blood flow
- Pulmonary compliance, *See under* Lung(s)
- Pulmonary drug uptake, *See under* Lung(s)
- Pulmonary edema, *See under* Complications; Lung(s)
- Pulmonary hypertension, *See under* Complications
- Pulmonary vascular response, *See under* Hypoxia
- Pulmonary vasoconstriction, *See under* Hypoxia
- Pulse oximeter, *See under* Equipment
- Pulse oximetry, *See under* Measurement techniques; Monitoring
- Pulsed Doppler, *See under* Monitoring

Q

- QT interval, *See under* Heart; Monitoring
- Quinidine, *See under* Interactions

R

- Radial artery, *See under* Arteries
- Radioimmunoassay, *See under* Measurement techniques
- Radiotherapy, *See under* Surgery
- Rat, *See under* Species
- Receptors  
  alpha adrenergic receptors  
    calcium entry blockers and (OA) [Massagee, McIntyre, Kates, Reves & Bai], 485  
  beta adrenergic receptors  
    calcium entry blockers and (OA) [Massagee, McIntyre, Kates, Reves & Bai], 485

Recovery

- recovery room  
    information feedback and pulse oximetry and (OA) [Cooper, Cullen, Nemeskai, Hoaglin, Gevirtz, Csete & Venable], 686  
    unexpected focal neurologic deficit at (CR) [Oliver, Cucchiara, Warner & Muir], 823
- Reductive metabolism, *See under* Metabolism
- Reflexes  
  swallowing reflex  
    depression of, during analgesia produced by inhalation of 50% nitrous oxide in oxygen (CR) [Nishino, Takizawa, Yokokawa & Hiraga], 995
- Regional anesthesia, *See under* Anesthetic techniques
- Regional ventricular function, *See under* Heart
- Renal transplantation, *See under* Kidney
- Reports of Scientific Meetings, *See under* Organizations
- Research  
  ASA Award  
    to B. Raymond Fink (SA), 456  
  clinical  
    human rights and (CO) [Harte], 143  
    human rights and (CO) [Tarnow], 144
- Respiration, *See under* Ventilation
- Respiratory distress syndrome, *See under* Lung(s)
- Resuscitation, *See under* Shock
- Rhabdomyolysis, *See under* Complications
- Right atrial pressure, *See under* Blood pressure
- Right-to-left shunt, *See under* Heart
- Rigidity, *See under* Complications; Muscle

S

- Sacral intervertebral epidural block, *See under* Anesthetic techniques
- Sarcolemma, *See under* Muscle
- Sarcoplasmic reticulum, *See under* Muscle
- Scintigraphy  
  ventilation and perfusion lung, *See under* Measurement techniques
- Sedation  
  midazolam  
    following cardiac surgery (CR) [Westphal, Cheng, White, Sladen, Rosenthal & Sung], 257
- Sellick's maneuver, *See under* Position
- Serotonin, *See under* Lung(s); Pharmacology
- Serotonergic antagonists, *See under* Antagonists
- Sevoflurane, *See under* Anesthetics, volatile
- Shnider, S. M. (ed.)  
  *Anesthesia for Obstetrics*, 2nd Edition (BR), 615
- Shock  
  hemorrhagic  
    in changes in plasma osmolality and oncotic pressure (OA) [Zornow, Todd & Moore], 936  
  resuscitation  
    in changes in plasma osmolality and oncotic pressure (OA) [Zornow, Todd & Moore], 936
- Shoulder, *See under* Anatomy
- Shunting, *See under* Lung(s)
- Shunts, *See under* Heart; Lung(s)
- Skeletal muscle rigidity, *See under* Hyperthermia, malignant
- Skeletal muscle, *See under* Muscle
- Skin  
  in regional anesthesia in child with epidermolysis bullosa (CR) [Koplan & Strauch], 262
- Snyder, J. V., and Pinsky, M. R.  
  *Oxygen Transport in the Critically Ill* (BR), 614

- Soda lime, *See under* Carbon dioxide
- Sodium bicarbonate, *See under* Acid-base equilibrium
- Species
- rat
    - cirrhotic, halothane metabolism in (OA) [Baden, Serra, Fujinaga & Mazze], 660
- Specific bradycardic agents, *See under* Pharmacology; Heart
- Spectral edge frequency, *See under* Monitoring
- Spectroscopy, magnetic resonance, *See under* Measurement techniques
- Spinal anesthesia, *See under* Anesthesia; Anesthetic techniques
- Spinal cord
- weakness
    - during sedation in cervical spondylosis (CR) [Miller, Crosby & Sundaram], 844
- Stellate ganglion block, *See under* Anesthetic techniques
- Stethoscope, *See under* Equipment
- Stethoscopic transmitter, *See under* Equipment
- Stimulator, *See under* Monitoring
- Stroke, *See under* Brain
- Stroke volume, *See under* Heart
- Subaortic stenosis, idiopathic hypertrophic, *See under* Heart
- Subarachnoid block, *See under* Anesthetic techniques
- Subpopulations, *See under* Immune response
- Succinylcholine, *See under* Interactions; Neuromuscular relaxants
- Sufentanil, *See under* Analgesics, narcotic; Anesthetics, intravenous
- Sulfur hexafluoride, *See under* Measurement techniques
- Sulphur hexafluoride, *See under* Gases, nonanesthetic
- Surgery
- cardiac
    - cardiopulmonary bypass
      - calcium entry blockers and  $\alpha$ -receptor responsiveness in patients undergoing (OA) [Massagee, McIntyre, Kates, Reves & Bai], 485
    - catheter perforation of pulmonary artery in (CR) [Johnston, Royster, Vinten-Johansen, Gravlee, Howard, Mills & Tucker], 110
    - clonidine, narcotic dose, and hemodynamics in (OA) [Flacke, Bloor, Flacke, Wong, Dazza, Stead & Laks], 11
    - coronary artery bypass, lethal thrombosis during (CR) [Litwack & Harrow], 134
    - coronary artery bypass grafting, natural killer cell activity during (OA) [Tønnesen, Brinkløv, Christensen, Olesen & Madsen], 526
    - invasive *versus* 2D-echocardiography hemodynamic indices during (OA) [Thys, Hillel, Goldman, Mindich & Kaplan], 630
    - is EEG a useful monitor during? (CR) [El-Fiki & Fish], 575
    - midazolam infusion for sedation following (CR) [Westphal, Cheng, White, Sladen, Rosenthal & Sung], 257
    - pharmacologic EEG suppression during (OA) [Woodcock, Murkin, Farrar, Tweed, Guiraudon & McKenzie], 218
  - carotid endarterectomy
    - hypocalcemia and prolonged QT interval following (CR) [Zane, Eisenkraft & Haimov], 998
    - isoflurane decreases frequency of cerebral ischemia during (OA) [Michenfelder, Sundt, Fode & Sharbrough], 336
  - circumcision
    - analgesia following—ring block of penis (CR) [Broadman, Hannallah, Belman, Elder, Ruttimann & Epstein], 399
    - pain following, topical analgesia for relief of (CR) [Tree-trakarn, Pirayavaraporn & Lertakyananee], 395
  - high-risk
    - epidural anesthesia and analgesia in (CO) [Clark], 1026
    - epidural anesthesia and analgesia in (CO) [Day], 1025
    - epidural anesthesia and analgesia in (CO) [Frumin], 1023
    - epidural anesthesia and analgesia in (CO) [Glass & Yeager], 1026
    - epidural anesthesia and analgesia in (CO) [Jenkins], 1024
    - epidural anesthesia and analgesia in (CO) [Kehlet], 1022
  - lithotripsy
    - extracorporeal shock wave
      - hyperthermia and hypothermia as complications of (CO) [Malhotra], 448
  - liver transplantation
    - orthotopic, air embolism associated with veno-venous bypass during (CR) [Khoury, Mann, Porot, Abdul-Rasool & Busuttil], 848
    - orthotopic, atypical serum cholinesterase eliminated by (CR) [Khoury, Brill, Waits & Busuttil], 273
  - methylmethacrylate
    - and hemodynamic changes during total knee replacement surgery with total condylar prosthesis (CR) [Tartiere, Berthelin, Jehan, Trahay, Samii & Quesnel], 838
  - neurologic
    - nitrous oxide or isoflurane during, increase in cerebral blood volume in (OA) [Archer, Labrecque, Tyler, Meyer & Trop], 642
    - venous embolism during craniectomy in supine infants (CR) [Harris, Yemen, Davidson, Strafford, Rowe, Sanders & Rockoff], 816
  - ophthalmology
    - increased incidence of masseter spasm in children with strabismus (CR) [Carroll], 559
    - trismus following (EV) [Rosenberg], 453
  - orthopedic
    - and hemodynamic changes during total knee replacement surgery with total condylar prosthesis (CR) [Tartiere, Berthelin, Jehan, Trahay, Samii & Quesnel], 838
  - pancreatectomy
    - anesthesia for infant with severe hyperinsulinism treated by (CR) [Yamashita & Tsumeto], 985
  - pediatric
    - venous embolism during craniectomy in supine infants (CR) [Harris, Yemen, Davidson, Strafford, Rowe, Sanders & Rockoff], 816
  - pheochromocytoma
    - effect of autotransfusion of catecholamine levels during (CO) [Rice, Violante & Kreul], 1017
  - radiotherapy
    - craniospinal, anesthesia for children undergoing (CR) [Glauber & Audenaert], 801
  - thoracic
    - effect of halothane and isoflurane on arterial oxygenation during one-lung ventilation for (OA) [Benumof, Augustine & Gibbons], 910
    - high-frequency jet ventilation during (CR) [Howland, Carlson, Goldiner, Rooney, Concepcion, Bains & McCormack], 1009
  - thoracotomy
    - pain relief following, continuous thoracic epidural analgesia for (CR) [Logas, El-Baz, El-Ganzouri, Cullen, Staren, Faber & Ivankovich], 787
- Swallowing reflex, *See under* Reflexes
- Sympathetic nervous system
- $\alpha$  adrenergic agonist
    - clonidine
      - reduces halothane MAC in rats (CO) [Maze, Birch & Vickery], 868
  - $\alpha$  receptors
    - calcium entry blockers and (OA) [Massagee, McIntyre, Kates, Reves & Bai], 485
  - $\beta$  adrenergic blocking drugs
    - calcium entry blockers and (OA) [Massagee, McIntyre, Kates, Reves & Bai], 485

- beta adrenergic receptors**  
  **isoproterenol**  
    and hemodynamic effects of UL-FS 49 in isoflurane-anesthetized dogs (OA) [Riley, Gross, Kampine & Warltier], 707
- beta-receptor**  
  of lymphocyte membranes, effects of halothane on (LR) [Marty, Nivoche, Nimier, Rocchiccioli, Luscombe, Henzel, Loiseau & Desmonts], 974
- catecholamines**  
  effects of coronary artery bypass grafting and natural killer cell activity on (OA) [Tønnesen, Brinkløv, Christensen, Olesen & Madsen], 526
- epinephrine**  
  effects of droperidol on, in humans (OA) [Balagny, Gauzit, Marty, Couderc, Levron & Desmonts], 473  
  in study of effects of graded exercise on leg exchange of energy substrates in malignant hyperthermia susceptible subjects (OA) [Rutberg, Hakanson, Hall & Jorfeldt], 308  
  for test dose of epidural analgesia (CR) [Van Zundert, Vaes, Soetens, De Vel, Van Der Aa, Van Der Donck, Meeuwis & DeWolf], 436  
  levels, during pheochromocytoma, effect of autotransfusion of catecholamine on (CO) [Rice, Violante & Kreul], 1017
- norepinephrine**  
  and dose-response relationship of clonidine in tetracaine spinal anesthesia (OA) [Mensink, Kozody, Kehler & Wade], 717  
  effects of droperidol on, in humans (OA) [Balagny, Gauzit, Marty, Couderc, Levron & Desmonts], 473  
  in study of effects of graded exercise on leg exchange of energy substrates in malignant hyperthermia susceptible subjects (OA) [Rutberg, Hakanson, Hall & Jorfeldt], 308  
  in perioperative clonidine treatment in coronary bypass surgery (OA) [Flacke, Bloor, Flacke, Wong, Dazza, Stead & Laks], 11
- phenylephrine**  
  in study of calcium entry blockers and  $\alpha$ -receptor responsiveness (OA) [Massagee, McIntyre, Kates, Reves & Bai], 485
- clonidine**  
  in alpine anesthesia (EV) [Longnecker], 1  
  effect of, on perioperative hemodynamics and isoflurane requirements (OA) [Ghignone, Calvillo & Quintin], 3  
  reduced narcotic requirement by, and hemodynamics in coronary bypass surgery (OA) [Flacke, Bloor, Flacke, Wong, Dazza, Stead & Laks], 11
- guanethidine**  
  Bier block, apnea and syncope following (CO) [Woo & McQueen], 281
- ligand**  
  human beta-adrenergic receptor of, effects of halothane on (LR) [Marty, Nivoche, Nimier, Rocchiccioli, Luscombe, Henzel, Loiseau & Desmonts], 974
- propranolol**  
  distribution in dog, halothane and (OA) [Gordon, Wood, Koshakji, Wilkinson, Dupont & Wood], 225
- sympatholytic agents**  
  **clonidine**  
    dose-response relationship of, in tetracaine spinal anesthesia (OA) [Mensink, Kozody, Kehler & Wade], 717  
    distribution in dog, halothane and (OA) [Gordon, Wood, Koshakji, Wilkinson, Dupont & Wood], 225
- disulfiram**  
  -like reaction in carimofur after celiac plexus alcohol block (CR) [Noda, Umeda, Mori, Fukunaga & Mizoi], 809
- labetalol**  
  intravenous, for treatment of postoperative hypertension (CR) [Leslie, Kalayjian, Sirgo, Plachetka & Watkins], 413
- sympathomimetic agents**  
  **ephedrine**  
    for prevention of maternal hypotension during epidural anesthesia (CR) [Brizgys, Dailey, Shnider, Kotelko & Levinson], 782
- Sympatholytic agents, See under Sympathetic nervous system**  
**Sympathomimetic agents, See under Sympathetic nervous system**  
**Systolic arterial pressure, See under Circulation**  
**Systolic blood pressure, See under Blood pressure**
- T**
- Taylor, K.M.**  
  *Cardiopulmonary Bypass* (BR), 450
- Temperature**  
  **heating**  
    reduces recovery time (cost) in outpatients (CR) [Conahan, Williams, Apfelbaum & Lecky], 128
- hypothermia**  
  reduces recovery time (cost) in outpatients (CR) [Conahan, Williams, Apfelbaum & Lecky], 128
- monitoring, See under Monitoring**
- regulation**  
  **hypothalamus**  
    and core temperature changes during N<sub>2</sub>O fentanyl and halothane/O<sub>2</sub> anesthesia (CR) [Sessler, Rubinstein & Eger], 137
- setpoint**  
  and core temperature changes during N<sub>2</sub>O fentanyl and halothane/O<sub>2</sub> anesthesia (CR) [Sessler, Rubinstein & Eger], 137  
  setpoint, *See under Temperature, regulation*
- Teratogenicity, See under Pregnancy; Toxicity, fetal**  
**Tetracaine, See under Anesthetics, local**  
**Tetraethylammonium derivatives, See under Anesthetics, local**  
**Thiopental, See under Anesthetics, intravenous**  
**Thoracic anesthesia, See under Anesthesia**  
**Thoracic surgery, See under Surgery**  
**Thrombosis, See under Complications; Veins**  
**Tidal volume, See under Ventilation**
- Tolerance**  
  enflurane sparing effect of sufentanil in dogs (OA) [Hall, Murphy & Hug], 518  
  to anesthetics, *See under Anesthetics*
- Topical anesthesia, See under Anesthetic techniques**
- Torticollis**  
  acquired, *See under Complications*
- Tourniquets, See under Equipment**
- Toxicity**  
  **acute hepatotoxicity**  
    and halothane metabolism in rats (OA) [Baden, Serra, Fujinaga & Mazze], 660
- cirrhosis**  
  and halothane metabolism in rats (OA) [Baden, Serra, Fujinaga & Mazze], 660
- fetal**  
  **teratogenicity**  
    of nitrous oxide, isoflurane, and their combination, in Sprague-Dawley rats (OA) [Fujinaga, Baden, Yhap & Mazze], 960
- isoflurane**  
  in Sprague-Dawley rats (OA) [Fujinaga, Baden, Yhap & Mazze], 960
- liver**  
  and halothane metabolism in rats (OA) [Baden, Serra, Fujinaga & Mazze], 660
- mutagenicity**  
  in N-nitrosoamines derived from reaction of nitroprusside and secondary amines (CO) [Klopman, Frierson & Dauchot], 279
- neurotoxicity**  
  in ultralong-lasting nerve block (OA) [Lipfert, Seitz & Arndt], 896

- nitroprusside  
in N-nitrosamines derived from reaction of nitroprusside and secondary amines (CO) [Klopman, Frierson & Dauchot], 279
- nitrous oxide  
in Sprague-Dawley rats (OA) [Fujinaga, Baden, Yhap & Mazze], 960
- reproductive  
of nitrous oxide, isoflurane, and their combination, in Sprague-Dawley rats (OA) [Fujinaga, Baden, Yhap & Mazze], 960
- triethyldodecyl ammonium  
in ultralong-lasting nerve block (OA) [Lipfert, Seitz & Arndt], 896
- Trace concentrations, *See under Anesthetics*
- Trachea, *See under Airway*
- Tracheal intubation, *See under Anesthetic techniques; Intubation*
- Tracheal-esophageal fistula, *See under Airway*
- Tracheobronchial tree, *See under Anatomy*
- Transdiaphragmatic pressure, *See under Measurement techniques*
- Transesophageal echocardiography, *See under Monitoring*
- Transfusion  
autotransfusion  
effect of, on catecholamine levels during pheochromocytoma (CO) [Rice, Violante & Kreul], 1017
- dextran  
severe reaction to, despite hapten inhibition (CR) [Bernstein, Rosenberg, Pada & Jaffe], 567
- Transient hypoxia, *See under Blood*
- Translaryngeal ventilation, *See under Ventilation*
- Transport of ions, *See under Ions*
- Transtacheal high-frequency jet ventilation, *See under Ventilation*
- Triethyldodecyl ammonium, *See under Toxicity*
- Trisomy-21 syndrome, *See under Complications*
- Tubes, *See under Equipment*
- Twins  
conjoined  
perioperative management of (MI) [Diaz & Furman], 965
- Two-dimensional echocardiography, *See under Measurement techniques*

## U

- UL-FS 49, *See under Pharmacology*, specific bradycardic agent
- Upper airway obstruction, *See under Airway; Complications*
- Uptake of anesthetics, *See under Anesthetics*  
cerebral, *See under Brain*
- Uptake of ions, *See under Ions*
- Use-dependent block, *See under Nerve(s)*
- Uterine blood flow, *See under Hemodynamics*

## V

- Vancomycin, *See under Pharmacology*
- Vascular conductance, *See under Lung(s)*
- Vasoconstrictors, *See under Pharmacology*
- Vecuronium, *See under Neuromuscular relaxants; Pharmacokinetics*
- Veins  
thrombosis  
prevention  
with intermittent pneumatic compression of legs (CR) [Unger & Feiner], 266
- Ventilation  
artificial  
systolic pressure variation as indicator of hypovolemia in (OA) [Perel, Pizov & Cotev], 498
- carbon dioxide response  
following epidural sufentanil in children (OA) [Benlabeled, Ecoffey, Levron, Flaisler & Gross], 948

## controlled

- systolic pressure variation as indicator of hypovolemia in (OA) [Perel, Pizov & Cotev], 498

## failure

- acute, treatment by extracorporeal carbon dioxide elimination with artificial lung (CR) [Bindslev, Eklund, Norlander, Swedenborg, Olsson, Nilsson, Larm, Gouda, Malmberg & Scholander], 117

## high-frequency

- during thoracic surgical procedures (CR) [Howland, Carlon, Goldiner, Rooney, Concepcion, Bains & McCormack], 1009

## mechanical

- during thoracic surgical procedures (CR) [Howland, Carlon, Goldiner, Rooney, Concepcion, Bains & McCormack], 1009

## one-lung

- halothane and isoflurane only slightly impair arterial oxygenation during, in thoracotomy (OA) [Benumof, Augustine & Gibbons], 910
- high pressure pop-off safety device when using Bain circuit for CPAP oxygenation during (CO) [Hensley, Martin & Skeehan], 863
- sequential, for bilateral bullectomy (CR) [Benumof], 268
- ventilation/perfusion scans to predict oxygenation during (CR) [Hurford, Kolker & Strauss], 841

## pattern

- in bilateral bullectomy (CR) [Benumof], 268

## PEEP

- antidiuresis (CO) [Payen], 609
- antidiuresis (CO) [Urzuja], 608

## respiration

- and reduction of tonic ribcage muscle activity by anesthesia with thiopental (OA) [Drummond], 695

## tidal volume

- modified Pitot tube for, in children (LR) [Wolf & Volgyesi], 775

## translaryngeal

- cannulation: continuing misconceptions (CO) [Yealy & Stewart], 445
- Gildar's system of (CO) [Reich & Schwartz], 446
- Gildar's system of (CO) [Sosis], 446
- system of, problems with (CO) [Goldman & Braudel], 447

## transtracheal high-frequency jet

- percutaneous, as aid to fiberoptic intubation (CR) [Boucek, Gunnerson & Tullock], 247

Ventilation and perfusion lung scintigraphy, *See under Measurement techniques*Ventricular function, *See under Heart*Verapamil, *See under Pharmacokinetics; Pharmacology*, calcium blocking drugsViral infection, *See under Infection*Visual evoked potentials, *See under Monitoring*Volatile anesthetics, *See under Anesthetics*

## Vomiting

- nausea  
and effects of eliminating nitrous oxide in outpatient anesthesia (CR) [Melnick & Johnson], 982

## W

Washout, *See under Lung(s)*

## Water

- anesthetic degradation  
and stability of sevoflurane (LR) [Strum, Johnson & Eger], 779

## Wu, W.-H. (ed.)

- Pain Management: Assessment and Treatment of Acute and Chronic Syndromes* (BR), 614
